1 All-optical electrophysiology refines populations of in silico human iPS-CMs for drug  
2 evaluation

3

4 Running Title: Optically calibrated hiPS-CMs population

5

6 M Paci, E Passini, A Klimas, S Severi, J Hyttinen, B Rodriguez, E Entcheva

7

8

9 Keywords: Computational Methods & Bioinformatics; Ion Channels, Pharmacology &  
10 Disease; Cardiac, Smooth & Skeletal Muscle Electrophysiology.

11 Techniques: Electrophysiology; Fluorescence.

## 12 Abstract

13 High-throughput *in vitro* drug assays have been impacted by recent advances in human induced  
14 pluripotent stem cell-derived cardiomyocytes (hiPS-CMs) technology and by contact-free all-  
15 optical systems simultaneously measuring action potential (AP) and Ca<sup>2+</sup> transient (CaTr).  
16 Parallel computational advances have shown that *in silico* models can predict drug effects with  
17 high accuracy. In this work, we combine these *in vitro* and *in silico* technologies and  
18 demonstrate the utility of high-throughput experimental data to refine *in silico* hiPS-CM  
19 populations, and to predict and explain drug action mechanisms. Optically-obtained hiPS-CM  
20 AP and CaTr were used from spontaneous activity and under pacing in control and drug  
21 conditions at multiple doses.

22 An updated version of the Paci2018 model was developed to refine the description of hiPS-  
23 CM spontaneous electrical activity; a population of *in silico* hiPS-CMs was constructed and  
24 calibrated using the optically-recorded AP and CaTr. We tested five drugs (astemizole,  
25 dofetilide, ibutilide, bepridil and diltiazem), and compared simulations against *in vitro* optical  
26 recordings.

27 Our simulations showed that physiologically-accurate population of models can be obtained  
28 by integrating AP and CaTr control records. Thus constructed population of models predicted  
29 correctly the drug effects and occurrence of adverse episodes, even though the population was  
30 optimized only based on control data and *in vitro* drug testing data were not deployed during  
31 its calibration. Furthermore, the *in silico* investigation yielded mechanistic insights, e.g.  
32 through simulations, bepridil's more pro-arrhythmic action in adult cardiomyocytes compared  
33 to hiPS-CMs could be traced to the different expression of ion currents in the two.

34 Therefore, our work: i) supports the utility of all-optical electrophysiology in providing high-  
35 content data to refine experimentally-calibrated populations of *in silico* hiPS-CMs, ii) offers  
36 insights into certain limitations when translating results obtained in hiPS-CMs to humans and  
37 iii) shows the strength of combining high-throughput *in vitro* and population *in silico*  
38 approaches.

39

## 40 Significance

41 We demonstrate the integration of human *in silico* drug trials and optically-recorded  
42 simultaneous action potential and calcium transient data from human induced pluripotent stem  
43 cell-derived cardiomyocytes (hiPS-CMs) for prediction and mechanistic investigations of drug  
44 action. We propose a population of *in silico* models i) based on a new hiPS-CM model  
45 recapitulating the mechanisms underlying hiPS-CM automaticity and ii) calibrated with all-  
46 optical measurements. We used our *in silico* population to predict and evaluate the effects of 5  
47 drugs and the underlying biophysical mechanisms, obtaining results in agreement with our  
48 experiments and one independent dataset. This work supports the use of high-content, high-  
49 quality all-optical electrophysiology data to develop, calibrate and validate computer models  
50 of hiPS-CM for *in silico* drug trials.

51

## 52 Introduction

53 Both, new *in silico* methods and the use of human induced pluripotent stem cell-derived  
54 cardiomyocytes (hiPS-CMs) have become increasingly important in tackling the challenge of  
55 assessment and prediction of drug effects and their potential cardiotoxicity, as supported by the  
56 Comprehensive In Vitro Proarrhythmia Assay (CiPA) initiative (1, 2). Many *in silico* studies  
57 on this topic have been published in recent years, showcasing a variety of methodologies,  
58 including electrophysiological models of cardiac cells, machine learning algorithms, and a  
59 combination of both (3–8). The potential of hiPS-CMs for drug-induced pro-arrhythmia  
60 predictions *in vitro* has been shown in many experimental studies (9, 10) despite certain  
61 outstanding limitations. Concerns lie with their high inter-lab and inter-batch variability and  
62 level of maturity compared to adult cardiomyocytes (11), e.g. spontaneous beating, cell  
63 morphology, disorganization of their contractile elements (12), and different ion channel  
64 expression (13). Nevertheless, hiPS-CMs represent the best experimental platform to date to  
65 study human cardiac electrophysiology and drug action in a rigorous and scalable/high-  
66 throughput way. *In silico* models of hiPS-CMs have emerged (14–17) as an invaluable tool to  
67 better understand the distinct ionic mechanisms underlying hiPS-CM's drug response (18, 19).  
68 The robustness of *in silico* models depends on the amount and the quality of the experimental  
69 data used in their calibration and validation. Traditionally, such data have been acquired from  
70 a limited number of isolated cells (outside of their multicellular environment), through time-  
71 demanding and tedious manual patch-clamp techniques.

72 Limited experimental data present challenges of not being able to capture the genotypical and  
73 the phenotypical variability observed in a cell population, which is especially relevant for the  
74 highly-variable hiPS-CMs. These challenges have been partially addressed through modelling  
75 and data curation. *In silico* population of models approaches have been developed to reflect the  
76 wider range of parameters beyond the limited experimental data (20, 21). Database merging  
77 has also been used in the desire to expand the experimental data needed to tune the model  
78 parameters, e.g. in (19, 22) we merged 6 *in vitro* datasets of action potential (AP) biomarkers  
79 to generate a population of *in silico* hiPS-CMs. Using data from different laboratories widen  
80 the data variability considerably.

81 On the technology side, the problem of limited experimental data has been tackled by new  
82 experimental techniques with increased throughput and amenable to automation, e.g.  
83 automated patch-clamp platforms (23, 24) or microelectrode arrays (MEAs) (13). However,  
84 these techniques still suffer the limitations of probe-sample physical contact, which limits their  
85 performance with hiPS-CMs (25). Contact-free optical recordings overcome these limitations  
86 and offer comprehensive characterization. Calcium and contraction-measurement systems  
87 have been leveraged for cardiotoxicity testing (26). Ahola et al. (27, 28) developed a video-  
88 based contact-free method to quantify the biomechanics of beating hiPS-CMs, by processing  
89 simultaneous recording of motion and  $\text{Ca}^{2+}$  transients (CaTr) from fluorescence videos.  
90 However, AP signals represent key aspects of cardiotoxicity responses that may not be captured  
91 by field potentials, CaTr or mechanical contractions. All-optical electrophysiology (29, 30)  
92 approaches offer contactless interrogation and high-throughput records of voltage and calcium  
93 in an attempt to increase information content. Application of these techniques to drug screening  
94 with hiPS-CMs have been successfully demonstrated (25, 31, 32), including our OptoDyCE  
95 that combines optical pacing and simultaneous optical records of voltage and calcium or  
96 contractions. The use of optical systems with hiPS-CMs preparations provides an abundance

97 of *in vitro* data with the potential to provide an excellent basis to construct experimentally-  
98 calibrated population of *in silico* hiPS-CMs. The value of such high-content optical recordings  
99 of CaTr and AP (without ion channel level data) to constrain *in silico* populations of models  
100 remains to be tested.

101 The main goal of this work was to demonstrate the utility of *in silico* simulation trials informed  
102 by all-optical cardiac electrophysiology (optically-obtained high throughput measurements of  
103 AP and CaTr from hiPS-CMs under spontaneous and optically-triggered conditions) for  
104 prediction and mechanistic understanding of drug action. Optically-obtained AP and CaTr  
105 measurements are used to guide and improve the design and calibration of a population of *in*  
106 *silico* hiPS-CMs. We then test the performance of *in silico* simulation trials with the  
107 populations of models against *in vitro* drug trials for 5 reference compounds, both in terms of  
108 their consistency and to deepen the mechanistic insights unravelled. In detail: i) We present an  
109 improved version of the Paci2018 hiPS-CM model (15), providing improved simulation of the  
110  $\text{Na}^+/\text{Ca}^{2+}$  exchanger (INCX) role in sustaining the automaticity of AP. ii) We use high throughput  
111 optical measurement of AP, CaTr alone and both to calibrate an *in silico* population of hiPS-  
112 CMs models. iii) We challenge this population by applying 5 reference compounds at multiple  
113 concentrations, and comparing the results against *in vitro* data, not used for the calibration step.  
114 iv) We investigate the mechanisms underlying the different response to bepridil in hiPS-CMs  
115 (both *in vitro* and *in silico*) compared to adult cardiomyocytes.

## 116 Materials and Methods

### 117 Experimental dataset

118 The experimental dataset consists of AP and CaTr recordings from hiPS-CMs syncytia (CDI  
119 iCell<sup>2</sup> cardiomyocytes) obtained with the all-optical OptoDyCE system (25) in a 384-well plate  
120 format at room temperature (21°C) and with extracellular concentrations  $\text{Na}_0 = 135.0$ ,  $\text{K}_0 =$   
121  $5.4$  and  $\text{Ca}_0 = 1.33\text{mM}$ , in both paced and non-paced conditions. Recordings were performed  
122 in control conditions (0.1% DMSO) and following application of 5 reference compounds:  
123 astemizole (antihistamine), dofetilide (antiarrhythmic agent, class III), ibutilide  
124 (antiarrhythmic agent, class III) bepridil (antiarrhythmic agent, class IV) and diltiazem  
125 (antiarrhythmic agent, class IV).

126 Control recordings were performed on 10 plates (384-well format). Voltage and calcium-  
127 derived biomarkers were obtained from 5 independent multicellular samples per plate (each  
128 sample having at least 200 cells). The following biomarkers were considered: AP and CaTr  
129 cycle length (AP CL and CaTr CL), duration at 30%, 50% and 90% of AP repolarization  
130 ( $\text{APD}_{30}$ ,  $\text{APD}_{50}$  and  $\text{APD}_{90}$ ) and of CaTr decay ( $\text{CTD}_{30}$ ,  $\text{CTD}_{50}$ ,  $\text{CTD}_{90}$ ), AP and CaTr  
131 triangulation ( $\text{AP Tri}_{90-30} = \text{APD}_{90} - \text{APD}_{30}$  and  $\text{CaTr Tri}_{90-30} = \text{CTD}_{90} - \text{CTD}_{30}$ ) and CaTr time from  
132 CaTr onset to peak (CaTr  $t_{\text{Rise}_{0,\text{peak}}}$ ). Each measurement was characterized by its mean value  
133 (mean) and its standard deviation (SD) over a variable number of beats for each multicellular  
134 sample. Some acquisitions failed, and were discarded from the dataset, leading to a total of 42  
135 control non-paced and 49 control paced multicellular samples, thus integrating responses from  
136 over 8400 cells. Min and Max experimental ranges for each biomarker were computed by  
137 defining a lower and upper bounds ( $LB = \min(\text{mean} - 2 * SD)$  and  $UB = \max(\text{mean} + 2 *$   
138  $SD)$ , respectively), for non-paced and paced measurements, as reported in Table 1.

139 Reference compounds were tested in 5 plates (one for each drug), considering 4 increasing  
 140 doses (D1, D2, D3 and D4) and 6 multicellular samples for each dose (thus integrating  
 141 responses from at least 1200 cells per drug dose). After discarding failed recordings, we used  
 142 the same methods as in control to compute the experimental biomarker ranges.

143

144 **Table 1. Experimental ranges of the *in vitro* optical recordings**

|                                      | Control non-paced   |                     | Control paced      |                    |
|--------------------------------------|---------------------|---------------------|--------------------|--------------------|
|                                      | Lower Bound         | Upper Bound         | Lower Bound        | Upper Bound        |
|                                      | (LB <sub>NP</sub> ) | (UB <sub>NP</sub> ) | (LB <sub>P</sub> ) | (UB <sub>P</sub> ) |
| AP CL (ms)                           | 1310.2              | 12,798.5            | ---                | ---                |
| ADP <sub>90</sub> (ms)               | 485.1               | 1393.8              | 514.3              | 1397.6             |
| APD <sub>50</sub> (ms)               | 310.6               | 1059.6              | 332.5              | 932.4              |
| APD <sub>30</sub> (ms)               | 240.6               | 910.3               | 261.6              | 786.3              |
| AP Tri <sub>90-30</sub> (ms)         | 132.0               | 741.0               | 251.9              | 839.9              |
| CaTr CL (ms)                         | 1310.1              | 12,805.3            | ---                | ---                |
| CTD <sub>90</sub> (ms)               | 754.9               | 2897.5              | 863.2              | 1803.0             |
| CTD <sub>50</sub> (ms)               | 463.8               | 1376.4              | 510.5              | 1167.8             |
| CTD <sub>30</sub> (ms)               | 353.4               | 1065.2              | 382.7              | 983.7              |
| CaTr tRise <sub>0,peak</sub><br>(ms) | 112.9               | 622.3               | 96.5               | 473.8              |
| CaTr Tri <sub>90-30</sub> (ms)       | 104.8               | 1872.5              | 438.6              | 1140.6             |

145 LB<sub>NP</sub>: lower bound, non-paced; UB<sub>NP</sub>: upper bound, non-paced; LB<sub>P</sub>: lower bound, paced;  
 146 UB<sub>P</sub>: upper bound, paced; see main text for biomarker descriptions.

147 [Updated version of the Paci2018 hiPS-CM model](#)

148 A limitation of the Paci2018 hiPS-CM model (15) was noted - namely, failure to reproduce the  
 149 cessation of the spontaneous electrical activity following strong block of the I<sub>NCX</sub>, as shown by  
 150 recent *in vitro* and *in silico* experiments (16, 33). A very large window current in Paci2018 for  
 151 the fast Na<sup>+</sup> current (I<sub>Na</sub>) was identified as the key to sustaining the automaticity upon I<sub>NCX</sub>  
 152 block. We improved the Paci2018 model to reproduce this specific mechanism, while  
 153 preserving all its good features. We kept the same structure of the Paci2018: the model includes  
 154 two compartments, namely cytosol and sarcoplasmic reticulum (SR), and it follows the  
 155 classical Hodgkin & Huxley formulation, which describe the membrane potential as

$$C \frac{dV}{dt} = -(I_{Na} + I_{NaL} + I_f + I_{CaL} + I_{to} + I_{Kr} + I_{Ks} + I_{K1} + I_{NCX} + I_{NaK} + I_{pCa} + I_{bNa} + I_{bCa} - I_{stim}),$$

where  $C$  is the membrane capacitance  $V$  the membrane voltage and  $I_{stim}$  the stimulus current. The ion current/pumps in the model are:  $I_{Na}$ , the late  $Na^+$  current ( $I_{NaL}$ ), the funny current ( $I_f$ ) the L-type  $Ca^{2+}$  current ( $I_{CaL}$ ), the transient outward  $K^+$  current ( $I_{to}$ ), the rapid and slow delayed rectifier  $K^+$  currents ( $I_{Kr}$  and  $I_{Ks}$ ), the inward rectifier  $K^+$  current ( $I_{K1}$ ), the  $Na^+/Ca^{2+}$  exchanged ( $I_{NCX}$ ), the  $Na^+/K^+$  pump ( $I_{NaK}$ ) the sarcolemmal  $Ca^{2+}$  pump ( $I_{pCa}$ ) and the  $Na^+$  and  $Ca^{2+}$  background currents ( $I_{bNa}$  and  $I_{bCa}$ ). The SR compartment exchanges  $Ca^{2+}$  with cytosol through three fluxes: RyR-sensitive release current ( $I_{rel}$ ), SERCA pump ( $I_{up}$ ) and leakage current ( $I_{leak}$ ).

To develop the Paci2019 model (details in the Supporting Material):

- we updated the formulations for  $I_{Na}$  and  $I_f$  with the ones proposed in (16);
- we optimized the model parameters to fit the same dataset of *in vitro* AP and CaTr biomarkers used for (15), which have been recorded at 37°C;
- we validated the model against the same experimental protocols used for (15).

As a result, we obtained an improved version of our hiPS-CM model (Paci2019), where the spontaneous electrical activity is triggered both by  $I_f$  and  $Ca^{2+}$  release from the sarcoplasmic reticulum, which in turn depolarize the membrane potential via  $I_{NCX}$ . Details on the optimization procedure are reported in the Supporting Material, together with the model parameter values and equations.

The optically-obtained *in vitro* data in this paper were recorded at 21°C and with extracellular concentrations ( $Na_o = 135.0$ ,  $K_o = 5.4$  and  $Ca_o = 1.33$ mM instead of  $Na_o = 150.0$ ,  $K_o = 5.4$  and  $Ca_o = 1.8$ mM). Consequently, we implemented temperature correction of the new Paci2019 model to these conditions. Temperature difference was managed by setting the correct temperature in the specific model parameter affecting the Nernst potentials and ion currents such as  $I_{NCX}$  or  $I_{NaK}$ , rescaling the time constants of the other main ionic currents by means of the  $Q_{10}$  factors reported in (34–37), and summarized in Table S1 in the Supporting Material.

### hiPS-CM *in silico* population calibrated with optical AP and CaTr recordings

The new Paci2019 model, adapted to the temperature and extracellular concentrations of the optical recordings, was used as baseline to construct a population of *in silico* hiPS-CMs, based on the population of models methodology (19, 20, 38). We sampled a total of 22 parameters in the [50-150]% range compared to their original values. Parameters were chosen similarly to (39), to include all the main ionic conductances, as well as key kinetics parameter, known to impact both AP and CaTr biomarkers: (i) the maximum conductances of  $I_{Na}$ ,  $I_{NaL}$ ,  $I_f$ ,  $I_{CaL}$ ,  $I_{to}$ ,  $I_{Ks}$ ,  $I_{Kr}$ ,  $I_{K1}$ ,  $I_{NCX}$ ,  $I_{NaK}$ ,  $I_{pCa}$ ,  $I_{rel}$ ,  $I_{up}$ ; (ii) activation and inactivation time constants of  $I_{Na}$ ,  $I_{CaL}$  and  $I_{rel}$ ; (iii) adaptation time constant and half inactivation  $Ca^{2+}$  concentration of  $I_{rel}$ ; (iv)  $I_{up}$  half saturation constant. An initial population of 30,000 hiPS-CMs was generated, and then calibrated based on the optical recordings, i.e. only the models whose biomarkers were in agreement with the *in vitro* data were maintained. Biomarkers were computed in steady state (after 800s), as the average on the last 20 beats. The lack of absolute amplitude values for AP in the optically-recorded data was handled by an additional biomarker to constrain the amplitude of the non-paced AP (AP peak between 17.0 and 57.7 mV), as in (19).



198 Three different calibration options were performed considering both paced and non-paced  
199 biomarkers, thus generating three different experimentally-calibrated populations: i) All AP  
200 and CaTr biomarkers (AP\_CaTr population); ii) AP biomarkers only (AP\_only population);  
201 iii) CaTr biomarkers only (CaTr\_only population). The three populations were compared to  
202 investigate how the choice of AP and CaTr biomarkers affect the calibration process and the  
203 coverage of the biomarker space compared to experimental ranges.

#### 204 *In silico* drug trials

205 *In silico* drug trials were performed for 5 compounds (astemizole, dofetilide, ibutilide, bepridil  
206 and diltiazem) considering the 4 concentrations for each tested *in vitro*. Drug simulations were  
207 run for 400s from steady state conditions. Models were not paced, to also investigate drug-  
208 induced effect on the spontaneous beating frequency. We used a simple pore-block drug model  
209 as in (3, 19, 38), consisting of IC<sub>50</sub> and Hill's coefficients from literature and reported in Table  
210 S2 in the Supporting Material. The experimental concentrations for each drug are reported in  
211 Table S3 in the Supporting Material, together with the corresponding percentage of residual  
212 currents following drug application and the maximal effective free therapeutic concentration  
213 (EFTPC<sub>max</sub>), for comparison.

214 Because of the discrepancy between hiPSC and adult CMs observed for bepridil ((40) vs (3,  
215 41)), only for bepridil 10μM, we run additional tests, reducing its I<sub>CaL</sub> blocking action to half  
216 (64% residual I<sub>CaL</sub> instead of 32%) and to zero (100% residual I<sub>CaL</sub>), while preserving its  
217 blocking action on the other ion channels. This test was done on 4 models selected among the  
218 ones that showed a pro-arrhythmic behaviour when administered astemizole.

219 Following drug application, we assessed the drug-induced changes on AP and CaTr  
220 biomarkers, as well as the occurrence of abnormalities. Single and multiple early after-  
221 depolarizations (EADs) were defined as extra-peaks greater than -55mV in between two  
222 consecutive AP upstrokes. Repolarisation failure were identified when a stable ( $dV/dt_{max} < 0.1$   
223 V/s) membrane potential  $> -40$  mV was observed during the last 15 s of simulation. Irregular  
224 rhythm was identified when the difference in cycle length between two consecutive AP greater  
225 than 150%.

226 We looked also for two additional phenotypes, that we did not consider as abnormalities:  
227 quiescence (40) and residual activity (42), mainly occurring during diltiazem administration  
228 (see Results). If a model reacted to drug by producing AP whose peaks were greater than -  
229 40mV but smaller than 0mV, we labelled the model as residual activity. Conversely, we  
230 considered the model quiescent, i.e. not producing anymore spontaneous AP, if during the last  
231 15s the average membrane potential was smaller than -40mV or a potential residual activity  
232 had all the peaks smaller than -40mV.

233

## 234 Results

### 235 The new Paci2019 hiPS-CMs model

236 The automated optimization process successfully identified a new Paci2019 model in  
237 agreement with the *in vitro* AP and CaTr biomarkers used in (15), as shown in Table 2. Figure  
238 S1 in the Supporting Material shows a detailed comparison between the new model (in black)  
239 and the Paci2018 model (in red) (15). Parameter values are reported in the Supporting Material.



240 The main difference between the two models is the shape of the  $I_{NCX}$  current. Before the  
241 upstroke, the new  $I_{NCX}$  provides an additional inward contribution ( $-0.5A/F$ ) that is added to  $I_f$   
242 ( $-0.25A/F$ ), supporting the membrane depolarization and allowing the opening of the  $I_{Na}$   
243 channels. Figure 1 illustrates the contribution of  $I_{NCX}$  to the hiPS-CM automaticity, as reported  
244 in (16, 33): blocking  $I_{NCX}$  reduces its inward component slowing down the rate of spontaneous  
245 AP, up to suppression. In particular, an issue in the Paci2018 model was that AP suppression  
246 did not happen, in disagreement with *in vitro* data by Kim et al. (33) in response to  $2\mu M$   
247 SEA0400, an inhibitor of the forward  $I_{NCX}$  in a cluster of hiPS-CMs. The large  $I_{Na}$  window  
248 current was identified as a key factor in supporting the automaticity, thus making the Paci2018  
249 model unable to capture the aforementioned mechanism.

250 The new Paci2019 model can simulate spontaneous  $Ca^{2+}$  release from the SR both with  
251 standard extracellular  $Ca^{2+}$  concentration ( $Ca_o = 1.8mM$ , Figure S2 in the Supporting Material)  
252 and  $Ca^{2+}$  overload (simulated by increasing the extracellular  $Ca^{2+}$  concentration to  $Ca_o = 2.8,$   
253  $2.9$  and  $3.0mM$ , Figure S3 in the Supporting Material). Moreover, it reproduces well the *in*  
254 *vitro* data by Ma et al. (43) with ion channel blockers (Figure S4 in the Supporting Material),  
255  $I_f$  block and hyperkalemia experiments as (33) (see Supporting Information) and alternans in  
256 ischemia-like conditions as (15) (Figure S5 in the Supporting Material). Finally, the CaTr  
257 amplitude of  $160$  nM is in agreement with data by Rast et al. (44), recorded from hiPS-CM  
258 ensembles incubated at  $37^\circ C$  (calibrated Fura-2-based photometry measures) and not used for  
259 model calibration.

260 After updates for the extracellular ion concentrations and temperature adjustment, as described  
261 in Methods, the Paci2019 model's AP and CaTr biomarkers moved closer to the optical  
262 recordings reported in Table 1 obtained at room temperature. For example, spontaneous CL  
263 increased (from  $1,712$  to  $4,144$  ms) and  $APD_{90}$  prolonged from  $390$  to  $1,119$  ms. Figure 2 shows  
264 a comparison of the Paci2019 model (green traces) vs. the same model adapted for extracellular  
265 concentrations and temperature (blue traces).

266 Table 2. Action potential and Ca<sup>2+</sup> transient biomarkers simulated by the Paci2019  
267 hiPS-CM model at 37°C

| Biomarker<br>(reference)                | Experimental value<br>(mean±SD) | Simulated<br>value |
|-----------------------------------------|---------------------------------|--------------------|
| APA (mV) (43)                           | 104 ± 6.0                       | 102.0              |
| MDP (mV) (43)                           | -75.6 ± 6.6                     | -74.9              |
| AP CL (ms) (43)                         | 1700.0 ± 547.7                  | 1712.4             |
| dV/dt <sub>max</sub> (V/s) (43)         | 27.8 ± 26.3                     | 20.4               |
| APD <sub>10</sub> (ms) (43)             | 74.1 ± 26.3                     | 87.0               |
| APD <sub>30</sub> (ms) (43)             | 180 ± 58.6                      | 223.8              |
| APD <sub>90</sub> (ms) (43)             | 414.7 ± 119.4                   | 390.2              |
| AP Tri (-)(43)                          | 2.5 ± 1.1                       | 2.8                |
| CaTr DURATION (ms) (15)                 | 804.5 ± 188.0                   | 691.5              |
| CaTr tRise <sub>10,50</sub> (ms) (15)   | 82.9 ± 50.5                     | 55.0               |
| CaTr tRise <sub>10,90</sub> (ms) (15)   | 167.3 ± 69.8                    | 118.2              |
| CaTr tRise <sub>10,peak</sub> (ms) (15) | 270.4 ± 108.3                   | 184.0              |
| CaTr tDecay <sub>90,10</sub> (ms) (15)  | 409.8 ± 100.1                   | 341.0              |
| CaTr CL (ms) (15)                       | 1653.9 ± 630                    | 1712.4             |

268 AP and CaTr biomarkers from (15). Both AP and CaTr biomarkers were recorded at 37°C. AP  
269 biomarkers (patch-clamp): AP amplitude (APA); maximum diastolic potential (MDP); cycle  
270 length (CL); maximum upstroke velocity (dV/dt<sub>max</sub>); AP duration at 10%, 30% and 90% of  
271 repolarization (APD<sub>10</sub>, APD<sub>30</sub>, APD<sub>90</sub>); AP triangulation (AP Tri) computed as the ratio  
272 between APD<sub>30</sub>-APD<sub>40</sub> and APD<sub>70</sub>-APD<sub>80</sub>; CaTr DURATION; CaTr rise time from 10% to  
273 50% (CaTr tRise<sub>10,50</sub>), 90% (CaTr tRise<sub>10,90</sub>), and to CaTr peak (CaTr tRise<sub>10,peak</sub>), decay time  
274 from 90% to 10% (CaTr tDecay<sub>90,10</sub>), and CaTr rate (CaTr CL).

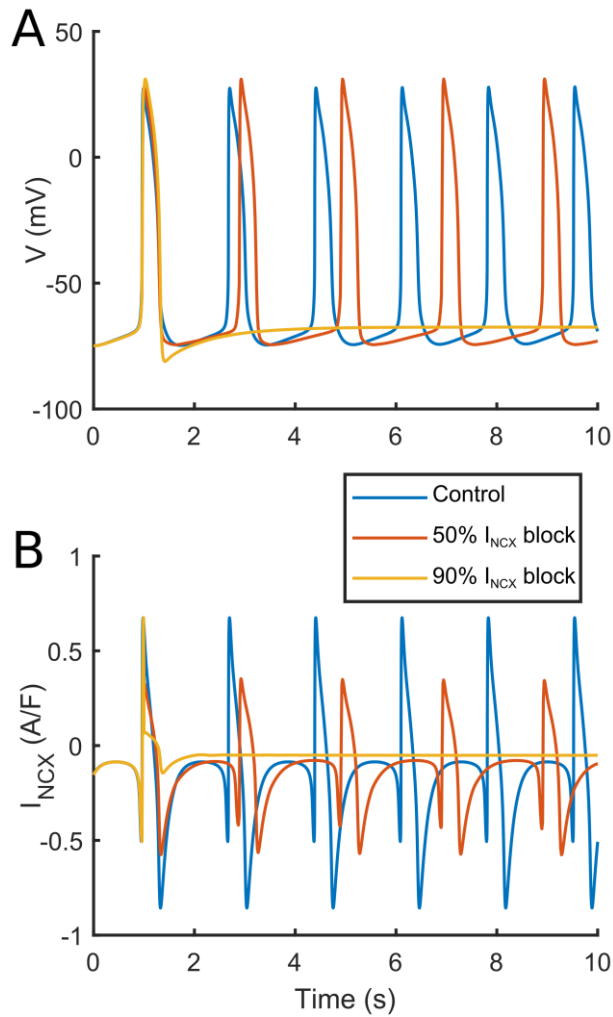

275

276 Figure 1. Effects of different levels of  $I_{NCX}$  block on the spontaneous AP simulated using the  
277 Paci2019 in control (blue line), with 50%  $I_{NCX}$  block (red line), and suppressed when  
278 considering high  $I_{NCX}$  block (yellow line).

279

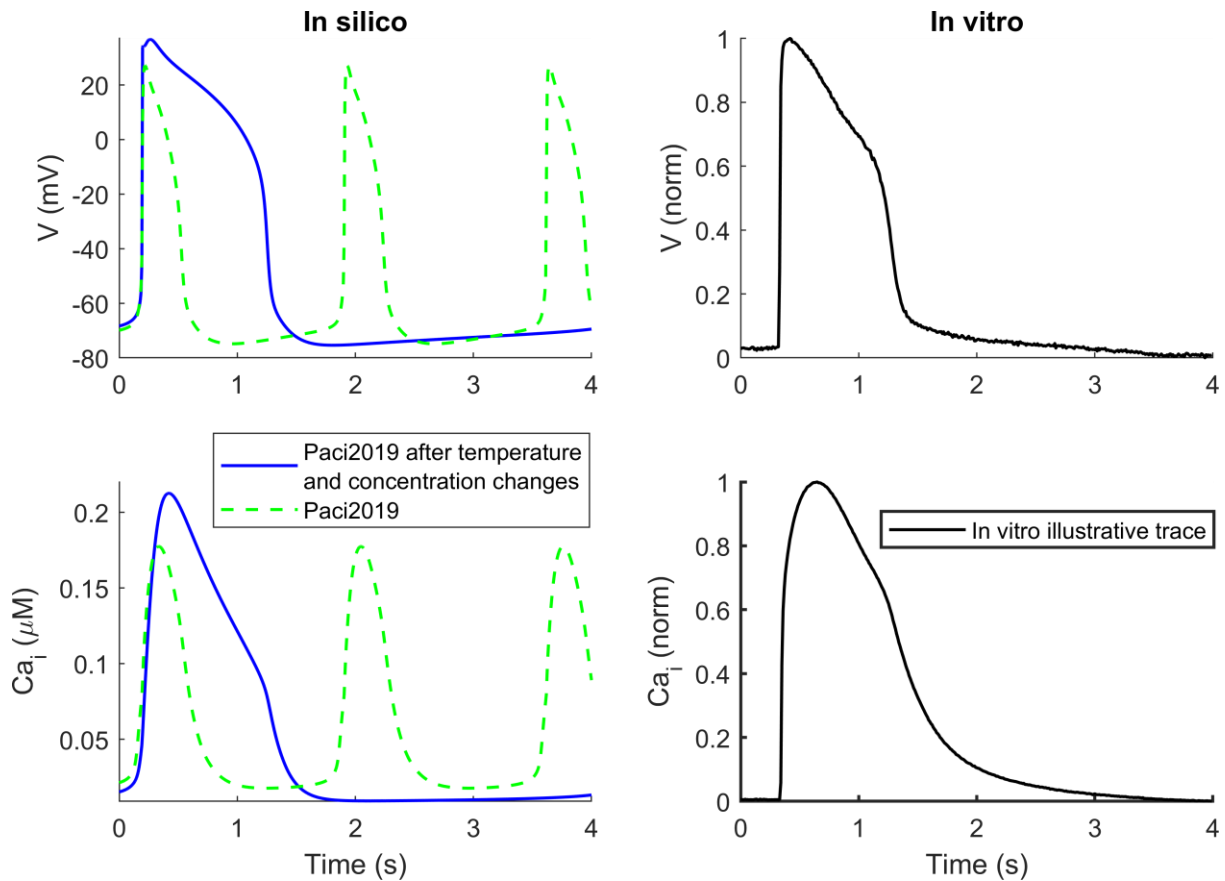

280

281 Figure 2. Simulated spontaneous AP and CaTr for the Paci2019 model at 37°C (green) vs the  
 282 same model adapted to 21°C (blue) and extracellular concentrations as in the *in vitro* optical  
 283 recordings (right column, spontaneous illustrative trace).

#### 284 [Single dataset calibration vs combined dataset calibration](#)

285 The Paci2019 model, adapted for the extracellular concentrations and room temperature used  
 286 in the *in vitro* experiments, was deployed to generate an initial population of 30,000 models.  
 287 As described in Methods, 3 different calibrations were performed (using AP only, CaTr only  
 288 or both AP and CaTr biomarkers), leading to 3 calibrated populations: AP\_only, CaTr\_only  
 289 and AP\_CaTr, respectively.

290 A comparison of the AP and CaTr biomarkers for the 3 populations is shown in Figure 3. The  
 291 AP\_only population (green boxplots) consists of 969 models. As expected, it shows good  
 292 agreement with the experimental AP biomarkers in addition to a good coverage of the  
 293 experimental ranges, both non-paced and paced (Panel A and B). However, many models have  
 294 CaTr biomarkers outside the experimental ranges, e.g. CTD<sub>90</sub>, CTD<sub>50</sub> and CTD<sub>30</sub> are often too  
 295 short (Panel C and D). The CaTr\_only population (black boxplots) consists of 5,030 models in  
 296 good agreement with CaTr biomarkers, both non-paced and paced (Panels C and D). However,  
 297 many models yield AP durations and triangulation outside the experimental ranges (Panels A  
 298 and B). As expected, the AP\_CaTr population, obtained by calibrating with both AP and CaTr  
 299 biomarkers (blue boxplots), appears to be the best constrained, with 477 models showing good  
 300 agreement and coverage of the biomarker space.

301 Figure 4 shows the distributions of the seven parameters with differential responses in the 3  
 302 experimentally-calibrated populations ( $|\Delta_{median}| > 10\%$  between AP\_only/CaTr\_only and

303 AP\_CaTr). Distributions of all parameters varied in the population are shown in Figure S6 in  
304 the Supporting Material. Adding AP biomarkers for calibration (AP\_only and AP\_CaTr  
305 populations vs. CaTr\_only) helps adjust five key parameters in important ways (lowers their  
306 median values):  $G_{Na}$ ,  $I_{Na}$  inactivation time constants,  $G_{K1}$ ,  $I_{NCX}$  maximum current and  $I_{CaL}$   
307 inactivation time constant (Figure 4). The smaller  $G_{Na}$  is due to the upper limit on AP peak.  
308 This also imposes a smaller  $I_{Na}$  inactivation time constant (faster inactivation), further  
309 contributing to reduced AP peak amplitude. A lower  $G_{K1}$  results in a slightly depolarized MDP,  
310 consequently reducing  $I_{Na}$  availability, and again limiting the AP peak. A reduced  $I_{NCX}$   
311 maximum current prevents an excessively fast early repolarization phase, e.g. short APD<sub>30</sub>.  
312 Finally, a smaller  $I_{CaL}$  inactivation time constant speeds up  $I_{CaL}$  inactivation, thus limiting  
313 excessively long AP.

314 Considering CaTr biomarkers for calibration (CaTr\_only and AP\_CaTr, vs AP\_only) increases  
315 the median values for two calcium-release parameters:  $I_{rel}$  inactivation time constant and  $I_{up}$   
316 half saturation value (Figure 4). The first causes a slower inactivation of  $I_{rel}$ , and consequently  
317 a longer CaTr (Figure 3, Panels C-D). The latter, that appears in the denominator of the  $I_{up}$   
318 formulation (15), causes a reduction of  $Ca^{2+}$  uptake, thus also contributing to a longer CaTr.

319 Overall, these results reveal important information contributed by the AP or CaTr biomarkers  
320 in the calibration process to better capture the experimental recordings. For the rest of this  
321 study, including the *in silico* drug trials, only the AP\_CaTr population of 477 hiPS-CM  
322 models was considered. The AP and CaTr traces for this population are shown in Figure 5.

323

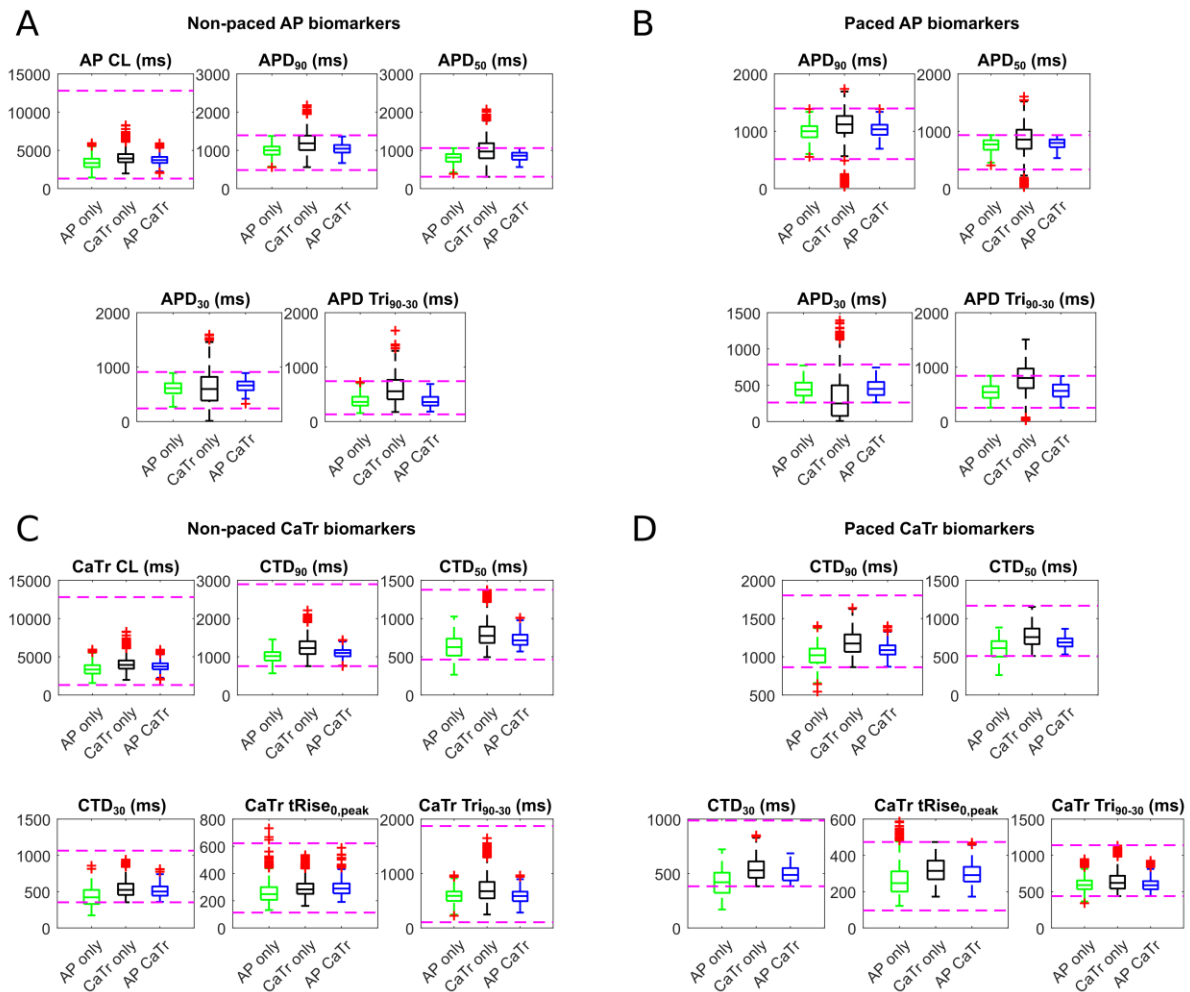

324

325 Figure 3. AP (A, B) and CaTr (C, D) biomarker distributions in the three populations of hiPS-  
 326 CM models, calibrated with *in vitro* AP biomarkers only (green), CaTr biomarkers only (black)  
 327 or both (blue). On each box, the central mark is the median of the population, box limits are  
 328 the 25<sup>th</sup> and 75<sup>th</sup> percentiles, and whiskers extend to the most extreme data points not  
 329 considered outliers. Red crosses represent outliers. The dashed magenta lines represent the  
 330 lower and upper bounds of the experimental recordings, as reported in Table 1.

331

332



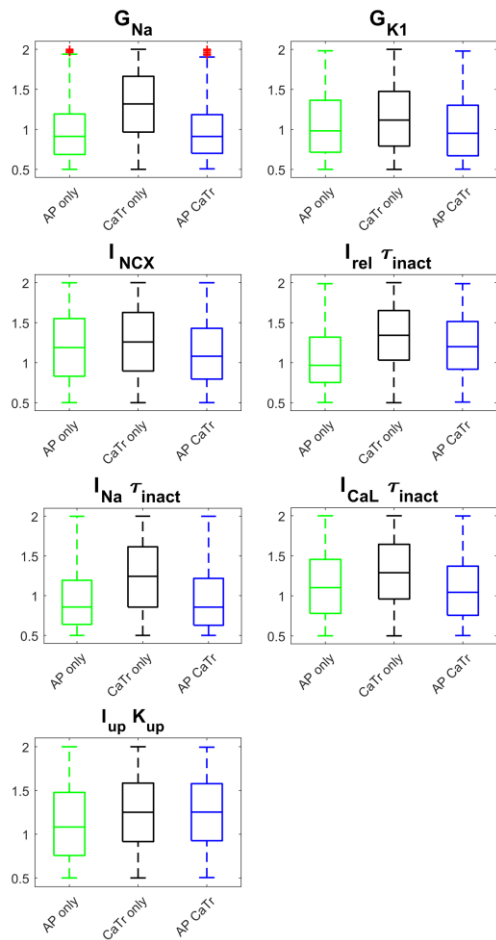

333

334 Figure 4. Parameter distributions for the three populations: AP\_only (green), CaTr\_only  
335 (black) and AP\_CaTr (blue). Red crosses represent outliers. Boxplot description as in Figure  
336 3. Only parameters with  $|\Delta\text{median}| > 10\%$  between AP\_only/CaTr\_only and AP\_CaTr are  
337 shown here, while distributions of all 22 parameters are reported in Figure S6.

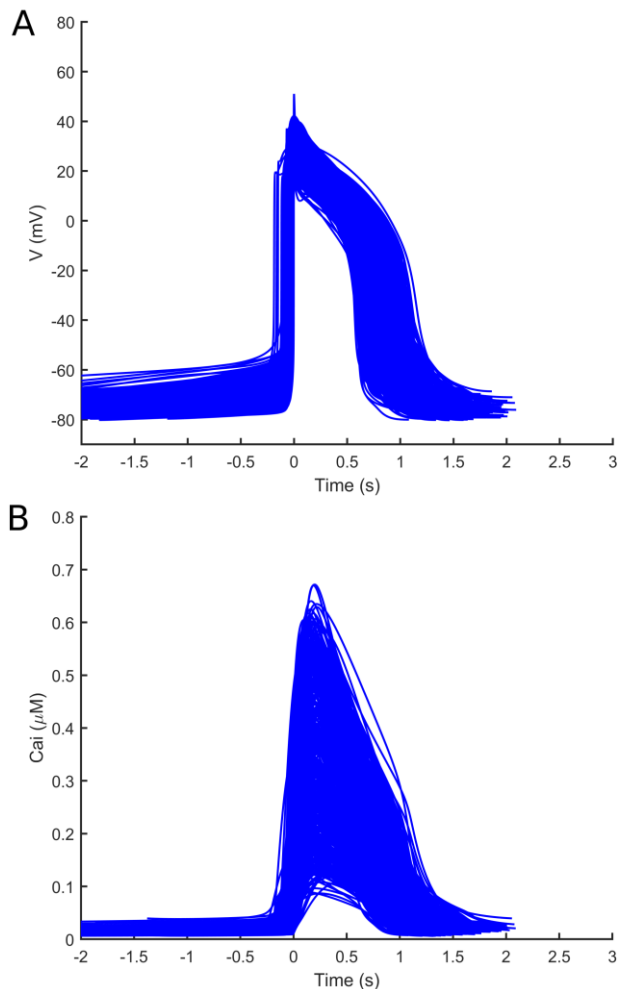

338

339 Figure 5. AP (A) and CaTr (B) traces included in the final population of 477 *in silico* hiPS-  
340 CMs, calibrated with both AP and CaTr biomarkers.

#### 341 *In silico* drug trials

342 Using the population of 477 hiPS-CM models shown in Figure 5, calibrated with both  
343 experimental AP and CaTr biomarkers, we ran *in silico* drug trials for 5 reference compounds  
344 (astemizole, dofetilide, ibutilide, bepridil, diltiazem) at 4 increasing concentrations (D1-D4)  
345 each. Simulation results were validated against the corresponding *in vitro* experiments, which  
346 were not used during the calibration process. For each drug trial, we checked how the drug  
347 affects the AP and CaTr biomarkers compared to control (D0), and assessed the presence of  
348 drug-induced abnormalities. Figure 6 summarizes the drug effects on four AP and CaTr  
349 biomarkers (AP CL, APD<sub>90</sub>, CTD<sub>90</sub> and CaTr Tri<sub>90-30</sub>). Shown are: i) *in silico* biomarker  
350 boxplots for the models that after drug administration still produce spontaneous AP and CaTr  
351 at room temperature and at the ion concentrations tested *in vitro*; and ii) *in vitro* optically-  
352 recorded biomarkers (green/purple diamonds) and their variability ranges (green/purple bars).  
353 Results for all biomarkers are shown in the Supporting Information, Figure S7-11 in the  
354 Supporting Material.

355 Our *in silico* population, calibrated with optically-recorded biomarkers in control conditions  
356 only, reproduces successfully the drug-induced changes in the AP and CaTr biomarkers. If no

357 *in vitro* biomarkers are reported for a specific dose, it means that the drug stopped the  
358 spontaneous activity in *in vitro* hiPS-CMs.

359 The four drugs (astemizole, dofetilide, ibutilide, bepridil), causing a strong  $I_{Kr}$  block, induced  
360 AP and CaTr prolongation. In particular, simulated APDs, CaTr  $t_{Rise_{0,peak}}$ , and AP and CaTr  
361  $Tri_{90-30}$  are well within the experimental ranges. Conversely, simulated AP and CaTr CL and  
362 CTDs tend to underestimate the prolongation observed *in vitro*. For diltiazem, a  $I_{CaL}$  blocker,  
363 simulations reproduced a dose-dependent APD<sub>90</sub> shortening. However, the CTD<sub>90</sub> prolongation  
364 observed *in vitro* for intermediate doses (D2 and D3) was not captured *in silico*. Table 3 reports  
365 the occurrences of drug-induced repolarisation abnormalities and quiescent phenotypes, both  
366 in simulations and experiments.

367 The *in vitro* dataset showed overall less abnormalities in hiPS-CMs in response to drugs than  
368 the simulations. A likely reason for this could be that *in silico* results assume single-cell  
369 behavior with a wide range of ionic profiles, while syncytial structures were used *in vitro*,  
370 where good cell-cell coupling usually has damping effects on pro-arrhythmic behavior. For the  
371 drugs inducing AP prolongation (astemizole, dofetilide, ibutilide and bepridil), the  
372 abnormalities recorded *in vitro* were single or multiple early-afterdepolarizations (EADs),  
373 corresponding to the types A, B and C reported in (13). We also observed 3 cases of  
374 tachyarrhythmia (rate of spontaneous oscillations > 2Hz), 2 for Dofetilide (D3 and D4,  
375 following EADs) and 1 for ibutilide (D4). Finally, 9 cases of irregular rhythm were observed:  
376 4 for Dofetilide (D1, D2 and D3), 4 for ibutilide (D1 and D2) and 1 for Bepridil (D1). For  
377 diltiazem, the abnormalities observed *in vitro* were an irregular rhythm at D1, a multiple EAD  
378 and irregular rhythm at D2 and a tachyarrhythmic time course at D4 (in 6 out of 6 observations,  
379 1 also with irregular rhythm).

380 In the simulations for 4 out of 5 tested compounds (astemizole, dofetilide, ibutilide and  
381 bepridil) we observed a variety of drug-induced phenotypes, as seen *in vitro* both in our  
382 experiments and in (13). Exemplary *in silico* traces are shown in Figure 7 and compared to *in*  
383 *vitro* experiments: single and multiple EADs (panels A, B, C, D), single EADs (panel E, F),  
384 repolarization failures (panels G, H) and irregular rhythms (panels I, J, K, L, M, N). Expanded  
385 and additional traces are reported in Figure S12 in the Supporting Material. In addition to AP  
386 shortening, for diltiazem we observed a residual electrical activity, characterized by low-  
387 amplitude oscillations and an EAD (Figure S13 in the Supporting Material).

388 For astemizole, *in silico* results reveal 9 abnormalities at D3, and 43 at D4 (mainly EADs and  
389 repolarization failures, but also 5 irregular rhythms per dose); the *in vitro* data show dose-  
390 dependent increase in pro-arrhythmic markers but no arrhythmia events per se at the tested  
391 doses. Again, the syncytial nature of the experimental samples and/or lower temperature may  
392 have dampened the arrhythmia events. Nevertheless, the simulation results are in agreement  
393 with the fact that at clinical doses, this drug is considered as intermediate risk in (40) on hiPS-  
394 CMs and at high risk in the *in silico* drug trials performed in (3) and in CredibleMeds (41).  
395 This highlights the value of *in silico* investigations with broader population of models to  
396 complement *in vitro* experiments, and ability to cover a wide range of ionic profiles.

397 Simulations of ibutilide and dofetilide closely agree with the experiments. A dose-dependent  
398 increase in abnormalities was seen, typical of drugs classified as high risk in CredibleMeds  
399 (41) and in hiPS-CMs in (40). The abnormalities *in silico* are mainly EAD and repolarization  
400 failures at the higher doses, together with few cases of irregular rhythm (ibutilide: 1 at D3 and  
401 2 at D4; dofetilide: 1 at D1, 5 at D2, 6 at D3). For dofetilide, at D4 we observed *in silico* only

402 5 repolarization abnormalities and 9 irregular rhythms, while all 6 *in vitro* recordings showed  
403 single or multiple early EADs. Therefore, we tested *in silico* 3 additional doses higher than D4,  
404 as in (3), that triggered a considerable amount of EADs (up to 59 EADs/repolarization failures  
405 at D7).

406 Bepridil simulations are in agreement with our *in vitro* experiments. Bepridil's main effect on  
407 hiPS-CMs is the suppression of spontaneous activity in a high percentage of the population  
408 (107/477 and 444/477 models, at D3 and D4, respectively). This is consistent with our *in vitro*  
409 experiments (6/6 observations at D4 did not produce AP) and with other reports (40).  
410 Conversely, only few abnormalities were observed in hiPS-CMs: *in vitro* only 1 irregular  
411 rhythm at D1 and *in silico* 5 and 6 abnormalities (2 irregular rhythms and the rest EADs) for  
412 D3 and D4, respectively, in agreement also with (40). However, this is in contrast with the high  
413 bepridil toxicity observed for adult cells *in vitro* and *in silico*, where it triggers many  
414 repolarization abnormalities (3, 41) and might be due to the different expression of ion currents  
415 in adult and hiPS-CMs, especially  $I_{CaL}$  (13). Therefore, for bepridil only, we tested also the  
416 effect of modulating its  $I_{CaL}$  blocking power, not changing the drug effect on  $I_{Na}$ ,  $I_{Kr}$  and  $I_{NaL}$ .  
417 Figure 8 shows four different models that developed abnormalities with astemizole D4, but not  
418 with Bepridil D4 (black traces). However, reducing to half bepridil  $I_{CaL}$  blocking power was  
419 already enough to trigger EADs. The same behavior was observed by fully inhibiting bepridil  
420  $I_{CaL}$  blocking effect.

421 For diltiazem, we observed *in silico* only 1 EAD at D4 (Figure S13, Panels C), but no  
422 tachyarrhythmic rhythm, as in our *in vitro* experiments. In fact, most of our models (Table 3)  
423 stopped their spontaneous AP, in agreement with what was observed in (40). However, 20  
424 models at D4 showed a strong decrease in AP amplitude (in few cases peaks were recorded  
425 below 0mV) and slight increase of frequency (Figure S13, Panels A and B). This low-amplitude  
426 oscillations (or residual activity) of the membrane potential were observed in Zeng et al. (42).  
427 Zeng et al. demonstrated that such residual electrical activity is due to a residual availability of  
428  $I_{Na}$ , not fully blocked by drugs specifically designed to mainly block L-type  $Ca^{2+}$  channels. It  
429 is possible that such abnormal re-activation of  $I_{Na}$  may have triggered re-entrant (tachycardic)  
430 responses in our multicellular experiments. *In silico* results provide further insights that this  
431 residual spontaneous electrical activity is due to a combination of residual  $I_{Na}$  (partly blocked  
432 by diltiazem, but still able to trigger an AP), strong  $I_f$  and weak  $I_{K1}$  (Table S4 in the Supporting  
433 Material, column RESAC).

434 Simulation studies were used to better understand biophysical mechanisms underlying the  
435 drug-induced phenotypes. We observed that the abnormalities induced by astemizole,  
436 dofetilide and ibutilide are mainly repolarization abnormalities, while bepridil and diltiazem  
437 mainly stopped the spontaneous activity. Table S4 summarizes the ionic parameter differences,  
438 the amount of repolarization abnormalities and residual activity at the maximal dose tested *in*  
439 *in silico* (D4, except D7 for dofetilide). For the cessation of the spontaneous activity, D3 had more  
440 balanced groups for bepridil and diltiazem. We focused our analysis only on those groups  
441 containing at least 20 models showing non-sinus rhythm. Models developing EADs and  
442 repolarization failures in response to astemizole, dofetilide and ibutilide show weak  $I_{Ks}$  and  $I_{K1}$   
443 compared to the models not developing such abnormalities, highlighting a reduced  
444 repolarization reserve. Also  $I_{pCa}$ , an outward flow of  $Ca^{2+}$  ions is very small, contributing to  
445 accumulation of positive charges in the cytosol. Conversely, a different pattern emerged for the  
446 models that terminated their spontaneous activity in response to bepridil and diltiazem. They

447 show, compared to the models still developing AP at D3, a strong  $I_{K1}$  that stabilizes the resting  
448 potential. Furthermore, especially for bepridil, the stronger  $I_{up}$  half saturation constant  $K_{up}$   
449 reduces the intake of  $Ca^{2+}$  by the SERCA pump and therefore the  $Ca^{2+}$  available to be released  
450 from the sarcoplasmic reticulum, impairing the  $Ca^{2+}$  handling that it is now an important  
451 component of automaticity in the Paci2019 model. For diltiazem, we found that  $I_{Na}$  was smaller  
452 in models where the drug terminated spontaneous activity compared to the group that still  
453 showed spontaneous activity.

454

455

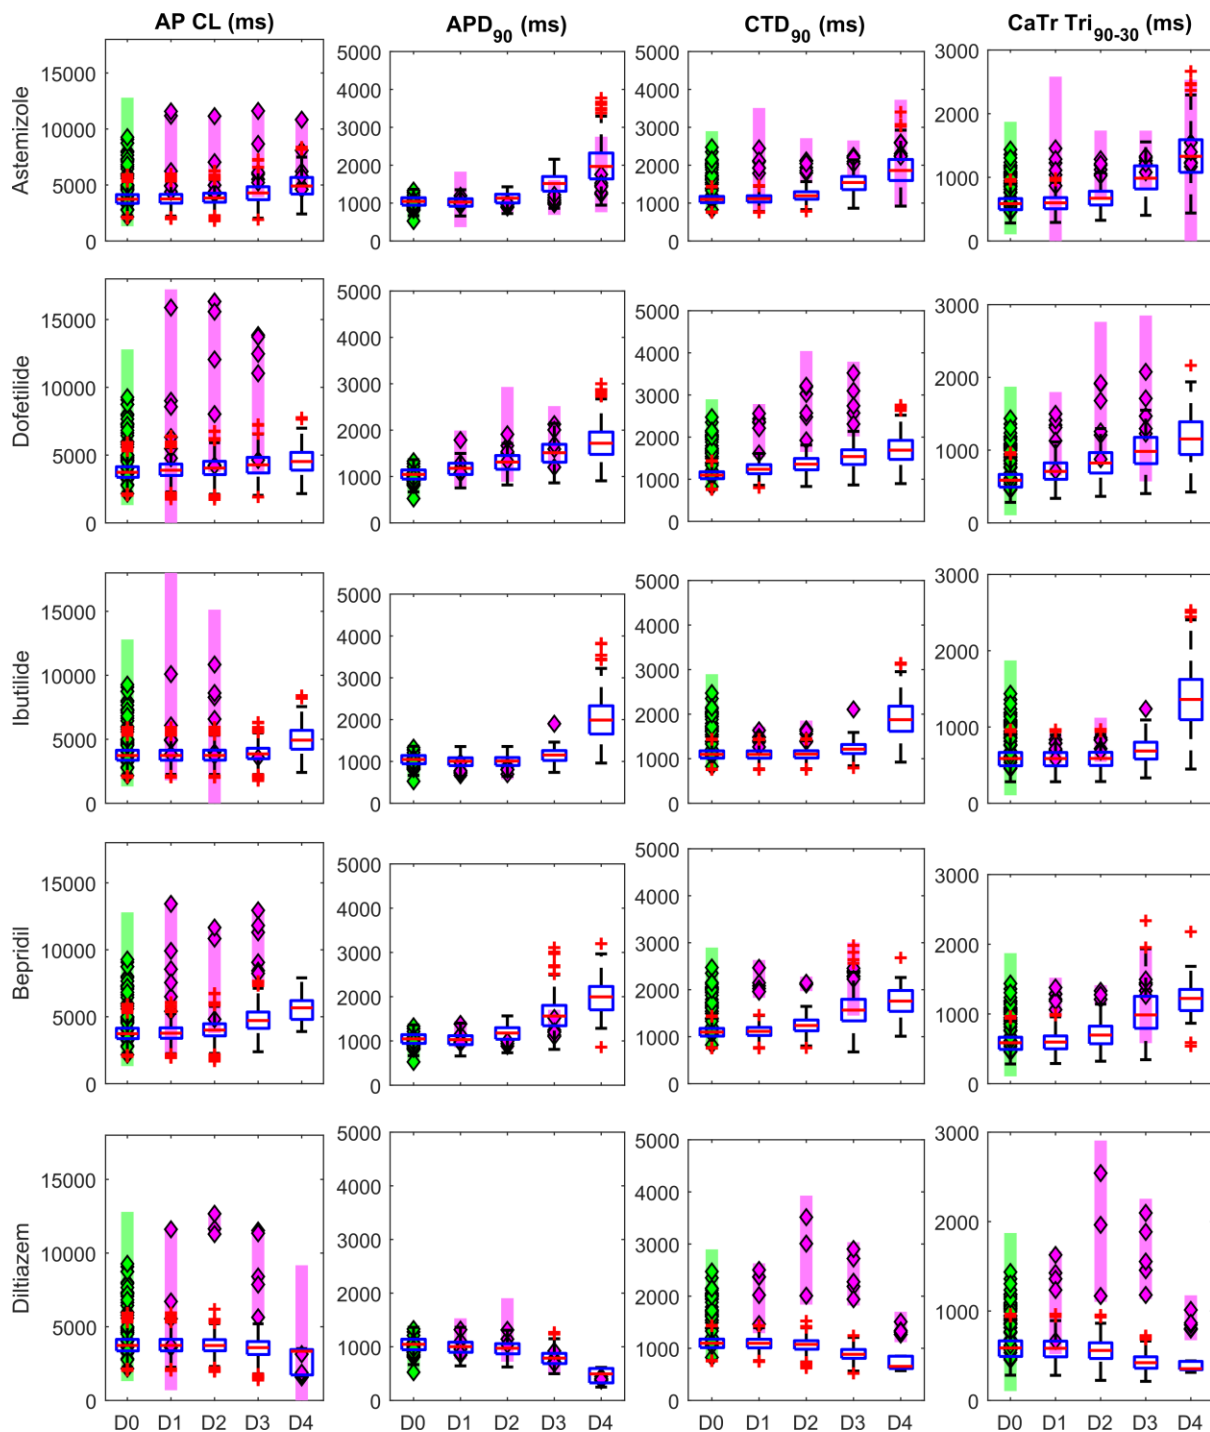

456

457 Figure 6. Summary of the drug-induced changes on 4 non-paced AP and CaTr biomarkers in  
 458 the *in silico* population of hiPS-CMs vs *in vitro* optical recordings. Each line shows results for  
 459 a different drug, tested at 4 concentrations (D1-D4) and compared to control conditions (D0).  
 460 Each column corresponds to a different biomarker. In each panel: blue boxplots, simulated  
 461 biomarkers (Boxplot description as in Figure 3); green diamonds, *in vitro* control biomarkers;  
 462 purple diamonds, *in vitro* biomarkers following drug applications; green/purple bars,  
 463 experimental ranges of the *in vitro* data. If no *in vitro* biomarkers are reported for a specific  
 464 dose, it means that it was not possible computing the biomarkers on the AP and CaTr.



465

466 Table 3. Drug-induced abnormalities observed in *in silico* vs *in vitro* non-paced hiPS-CMs.

| Drug       | Dose | <i>In silico</i> |     |    |     |       | <i>In vitro</i> |   |    |     |       |       |
|------------|------|------------------|-----|----|-----|-------|-----------------|---|----|-----|-------|-------|
|            |      | OK               | Q   | RA | IRR | RESAC | OK              | Q | RA | IRR | RESAC | Tachy |
| Astemizole | D1   | 476              | 1   | -  | -   | -     | 6               | - | -  | -   | -     | -     |
|            | D2   | 475              | 2   | -  | -   | -     | 6               | - | -  | -   | -     | -     |
|            | D3   | 466              | 2   | 4  | 5   | -     | 6               | - | -  | -   | -     | -     |
|            | D4   | 432              | 2   | 38 | 5   | -     | 6               | - | -  | -   | -     | -     |
| Bepridil   | D1   | 472              | 5   | -  | -   | -     | 5               | - | -  | 1   | -     | -     |
|            | D2   | 466              | 11  | -  | -   | -     | 6               | - | -  | -   | -     | -     |
|            | D3   | 365              | 107 | 3  | 2   | -     | 6               | - | -  | -   | -     | -     |
|            | D4   | 27               | 444 | 6  | -   | -     | -               | 6 | -  | -   | -     | -     |
| Diltiazem  | D1   | 477              | -   | -  | -   | -     | 5               | - | -  | 1   | -     | -     |
|            | D2   | 452              | 25  | -  | -   | -     | 4               | - | 1  | 1   | -     | -     |
|            | D3   | 204              | 269 | -  | 4   | -     | 6               | - | -  | -   | -     | -     |
|            | D4   | 12               | 444 | 1  | -   | 20    | -               | - | -  | 1*  | -     | 6*    |
| Dofetilide | D1   | 474              | 2   | -  | 1   | -     | 4               | - | -  | 2   | -     | -     |
|            | D2   | 470              | 2   | -  | 5   | -     | 5               | - | -  | 1   | -     | -     |
|            | D3   | 466              | 2   | 3  | 6   | -     | 5               | - | -  | 1   | -     | -     |
|            | D4   | 461              | 3   | 4  | 9   | -     | -               | - | 6* | -   | -     | 2*    |
|            | D5   | 455              | 3   | 12 | 7   | -     | -               | - | -  | -   | -     | -     |
|            | D6   | 435              | 1   | 39 | 2   | -     | -               | - | -  | -   | -     | -     |
|            | D7   | 414              | 1   | 59 | 3   | -     | -               | - | -  | -   | -     | -     |
| Ibutilide  | D1   | 477              | -   | -  | -   | -     | 5               | - | -  | 1   | -     | -     |
|            | D2   | 477              | -   | -  | -   | -     | 3               | - | -  | 3   | -     | -     |
|            | D3   | 474              | 2   | -  | 1   | -     | -               | - | 6  | -   | -     | -     |
|            | D4   | 427              | 1   | 47 | 2   | -     | -               | - | 5  | -   | -     | 1     |

467

468 OK: spontaneous beating with no abnormalities; Q: quiescence; RA: repolarization  
 469 abnormalities (early afterdepolarizations and/or repolarization failure); IRR: irregular rhythm;  
 470 RESAC: residual activity; Tachy: tachyarrhythmic oscillations; '-': phenotype not observed;  
 471 \*: *in vitro* observations showed more than one abnormal phenotype. For dofetilide,  
 472 D5=10xEFTPC<sub>max</sub>, D6=30xEFTPC<sub>max</sub> and D7=100xEFTPC<sub>max</sub> were tested only *in silico*, to  
 473 assess if doses higher than D4 would have triggered more abnormalities.

474

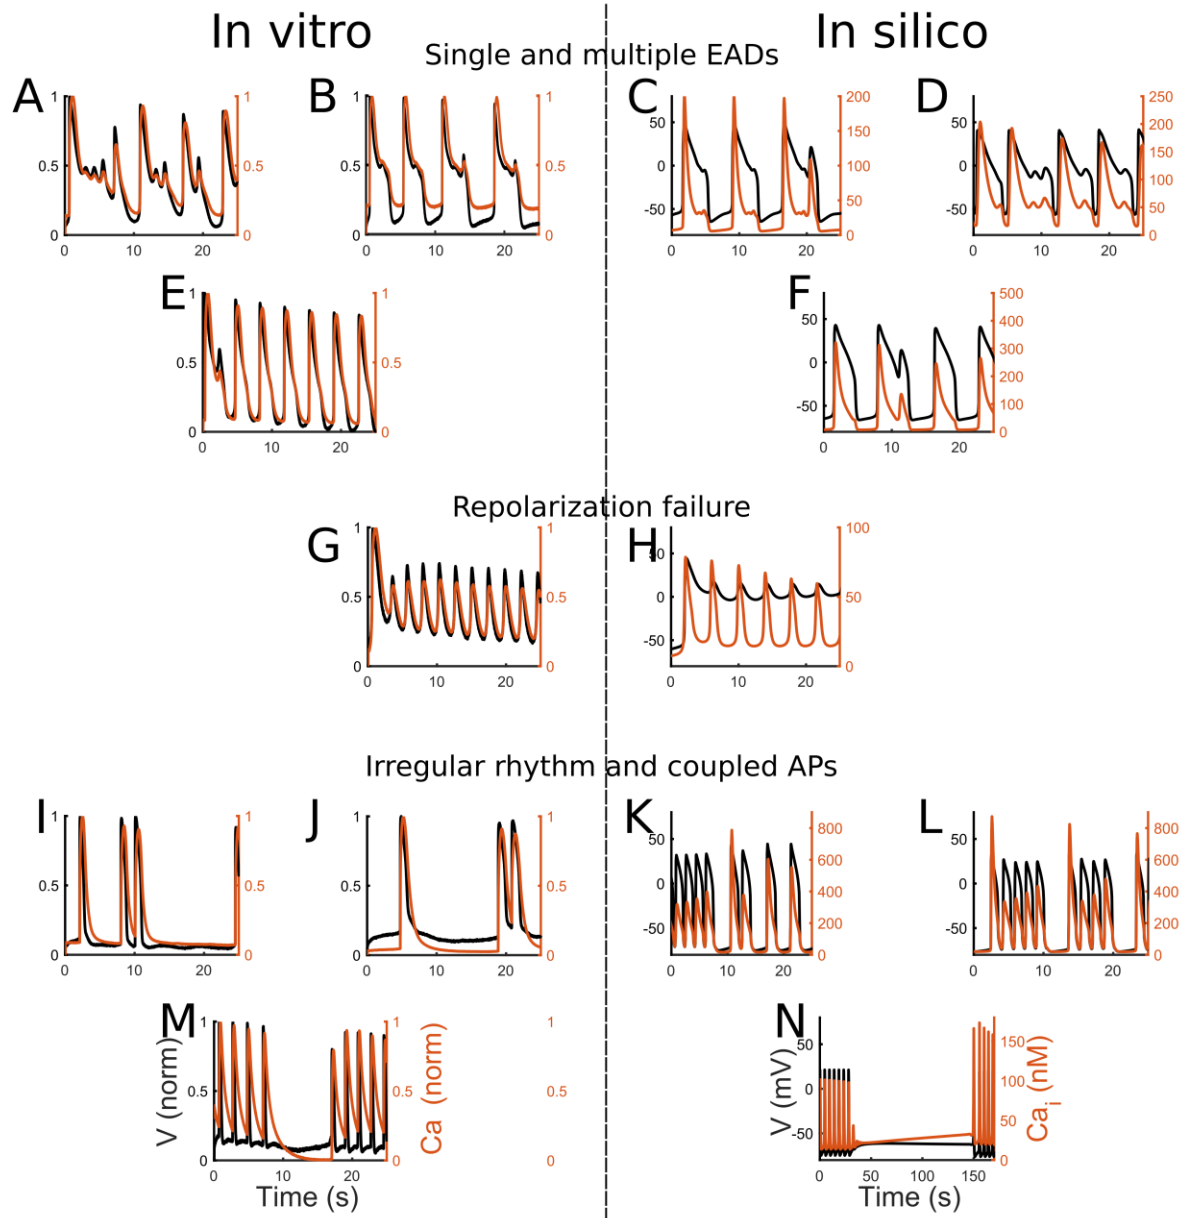

475

476 Figure 7. Illustrative abnormalities observed at room temperature during the drug trials *in vitro*  
 477 (left column) and *in silico* on the population from Figure 5. AP (black) and CaTr (orange). (A,  
 478 B, C, D) Single and multiple EADs. (E, F) Single EADs. (G, H) Repolarization failure. (I, J,  
 479 K, L) Irregular rhythms and coupled APs. (M, N) Irregular rhythm, temporary cessation of the  
 480 spontaneous activity.

481

482

483

484

485

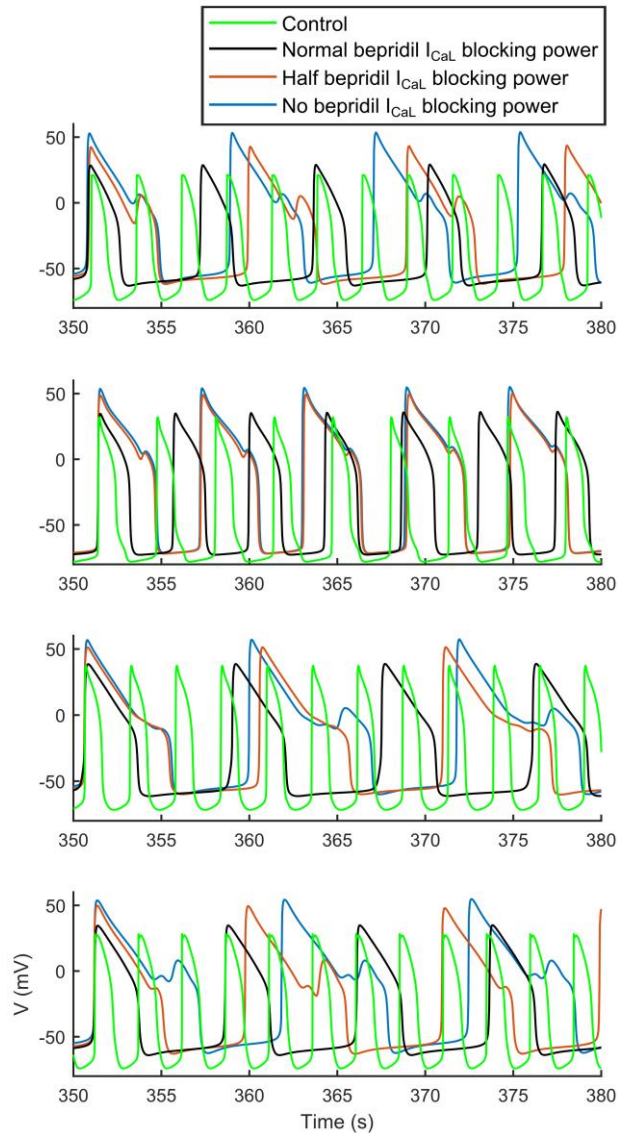

486

487 Figure 8. Effect of different  $I_{CaL}$  block level during administration of D4 Bepridil. For each of  
488 the 4 models (whose control AP are reported in green), we reduced bepridil blocking action of  
489  $I_{CaL}$ : normal  $I_{CaL}$  block (68% block in black); 36%  $I_{CaL}$  block (in orange); no  $I_{CaL}$  block (in  
490 blue). Bepridil effect on the other ion currents was not changed. Drug trials were performed at  
491 room temperature.

492

## 493 Discussion

494 Here we demonstrate the integration of human *in silico* drug trials and optically-recorded  
495 simultaneous AP and CaTr data from hiPS-CMs for prediction and mechanistic investigations  
496 of drug action. We report:

- 497 • An improved version of the Paci2018 hiPS-CM model (15) was developed and  
498 validated. It better reflects the mechanisms underlying AP automaticity.

- 499 • The value of comprehensive high-throughput optical measurements of cellular  
500 responses, especially combining AP and CaTr, is demonstrated in refining *in silico*  
501 populations of models.
- 502 • The predictive power of the experimentally-calibrated population of hiPS-CMs models  
503 is demonstrated through *in silico* drug trials on 5 drugs and comparison to *in vitro*  
504 datasets.
- 505 • Mechanistic insights are gleaned from *in silico* population runs to understand  
506 differential responses of hiPS-CM and adult cardiomyocytes to bepridil. Despite  
507 observed cardiotoxicity in adult cells (3, 41), *in vitro* experiments, in this dataset as well  
508 as in another independent *in vitro* dataset (40), showed low occurrence of proarrhythmic  
509 markers in hiPS-CMs. *In silico* trials with the hiPS-CMs models show a wide range of  
510 responses to drug action, which complement and explain the *in vitro* experiments.

511 Research on hiPS-CMs is rapidly developing, with new experimental data becoming available,  
512 which in turn serve as a driving force for the constantly evolving computational models to offer  
513 more accurate *in silico* tools to the scientific community. Based on *in vitro* (33) and *in silico*  
514 (16) tests, it was identified that our Paci2018 hiPS-CM model (15) did not properly reflect the  
515 role of *INCX* in automaticity, i.e. no cessation of spontaneous activity was seen in the model as  
516 consequence of a strong *INCX* block, as suggested by experiments. Therefore, we updated this  
517 hiPS-CM model to reproduce the specific mechanisms reported in (16, 33). (Figures 1, S1 and  
518 Supporting Material). In addition, the new Paci2019 model also qualitatively simulates the  
519 relationship between changes in CL and APD<sub>90</sub> as consequence of the *I<sub>f</sub>* modulation (Figure  
520 S16 in the Supporting Material). The model responds to *I<sub>f</sub>* augmentation with shorter CL and  
521 APD<sub>90</sub>, while *I<sub>f</sub>* reduction increases them. In Rast et al. (45), a similar relationship was  
522 observed in iCells (CDI) hiPS-CMs field potentials between the inter-beat interval and the field  
523 potential duration for ivabradine (for *I<sub>f</sub>* reduction) and forskolin (for *I<sub>f</sub>* augmentation).

524 Using the Paci2019 model to construct an *in silico* population based on our *in vitro* optical  
525 recordings, we showed that the combination of AP and CaTr biomarkers provides superior  
526 calibration, with a better coverage of the biomarker space (Figures 3). It is also interesting that  
527 the calibration with AP biomarkers was the most restrictive: AP\_CaTr and the AP\_only  
528 populations contained only 477 and 968 accepted models, respectively, while the CaTr\_only  
529 population contained over 5,000, many of which were inadequate, e.g. presented extremely  
530 short or long APs (Figure S14 in the Supporting Material). Therefore, model calibration  
531 exclusively based on CaTr can easily lead to inclusion of more unrealistic models for hiPS-  
532 CM. For this cell type, AP biomarkers are preferred to obtain physiological (or semi-  
533 physiological) models, while combining both biomarkers clearly refines the calibration. These  
534 tests highlight the importance of the calibration process and one of the main advantages of  
535 comprehensive records, such as the ones obtained through all-optical cardiac electrophysiology  
536 systems like OptoDyCE, that allow the acquisition of AP and CaTr in large populations of cells  
537 in their multicellular context.

538 Figures 6 and S7-11 compare simulated and experimental biomarkers. Of note, the  
539 experimental drug trials were not used to calibrate the population of models; yet, the  
540 experimentally observed biomarker trends over increasing drug doses, in particular APDs,  
541 CTDs and Tri<sub>90-30</sub>, were successfully reproduced. Moreover, for CaTr tRise<sub>0,peak</sub> and AP and  
542 CaTr Tri<sub>90-30</sub>, simulations showed good reproduction of the experimental variability intervals.  
543 CTDs were generally underestimated at the various drug doses. A possible reason for this is

544 the fact that in the control population (Figure 3) CTDs are included in the variability ranges,  
545 but they cannot cover the higher values. Physiologically-correct *in silico* drug-induced CaTr  
546 prolongation (except for diltiazem) was seen, as proven by the overlapping of the *in silico* and  
547 *in vitro* CaTr Tri<sub>90-30</sub>. However, the CTD<sub>90</sub> and CTD<sub>30</sub> absolute values after drug administration  
548 were overall smaller *in silico* than *in vitro*.

549 We were able to obtain the same abnormality classes (Figure 7) observed in our *in vitro* data  
550 and in (13), i.e. single and multiple EADs (panels A, B, C, D, E, F ), with the addition of  
551 repolarization failure (panels G and H), and irregular rhythms (panels I, J, K, L, M, N).  
552 Conversely, the *in silico* models did not show tachyarrhythmias observed e.g. in (13) or in 6  
553 cases in our *in vitro* experiments in response to the highest dose of diltiazem. As discussed  
554 previously, these tachyarrhythmias may be syncytium-level events *in vitro* that could not have  
555 been captured in the simulations. Furthermore, a common response of the *in silico* hiPS-CMs,  
556 especially to administration of diltiazem and bepridil, is the suppression of spontaneous  
557 activity. Indeed, diltiazem administration at D3 and D4 also stopped the spontaneous AP in a  
558 big portion of our *in silico* population, 269 and 444 models out of 477, respectively. This is in  
559 agreement with the *in vitro* diltiazem experiments of 7 out of 15 laboratories involved in the  
560 multisite study reported in (40), where 100% of the hiPS-CMs tested did not produce  
561 spontaneous AP after administration of 10 $\mu$ M diltiazem (equals to our D4). Furthermore, in 5  
562 laboratories a variable amount (20% - 70%) hiPS-CMs stopped beating. The same effect was  
563 observed for bepridil. In fact, as consequence of D3 and D4 bepridil administration, 107 and  
564 444 models out of 477 stopped. Again, this is in agreement with our *in vitro* experiments (no  
565 spontaneous AP at D4), and with the experiments of (40) (50% hiPS-CMs stopped spontaneous  
566 AP in 4 laboratories (out of 15) with D3 bepridil, and over 80-90% hiPS-CMs in 15 laboratories  
567 with D4 bepridil).

568 It is interesting to note that in our *in vitro* experiments, despite the reliable AP and CaTr  
569 duration and triangulation increase, astemizole did not induce abnormalities, while they were  
570 observable in 9 *in silico* hiPS-CMs at D3 and 43 at D4. Astemizole is considered an  
571 intermediate risk drug in (40) and a high-risk drug both *in vitro* (46) and in the *in silico* drug  
572 trials performed in (3). Especially in Blinova et al. (40), 11/15 laboratories observed single  
573 and multiple EADs in 100% of their cells at 37°C, in response to 0.1 $\mu$ M astemizole (equivalent  
574 to our D4). The absence of EADs in our *in vitro* data (while showing pro-arrhythmic markers  
575 such as APD prolongation and increased APD triangulation), may be due to a number of  
576 reasons. One possibility is the lower temperature, though temperature-corrected *in silico* hiPS-  
577 CMs revealed repolarization abnormalities. Another reason could be potentially higher I<sub>K1</sub> (and  
578 or I<sub>Ks</sub>) in our high-density syncytial preparations compared to other studies.

579 Overall, hiPS-CMs proved to be an effective *in vitro* and *in silico* model to test drug-induced  
580 adverse cardiac effects. Unexpected results *in vitro* and *in silico* for bepridil, considered a  
581 highly cardiotoxic drug (3, 41), prompted further investigation. As reported in Table 3, bepridil  
582 triggered a very small amount of abnormalities in our *in silico* population. This is in agreement  
583 with our *in vitro* experiments and with the tests performed by Blinova et al. (40): in this  
584 multisite study, used here for comparison only, bepridil stopped the spontaneous AP in 80-90%  
585 hiPS-CMs in all the 15 laboratories at the highest bepridil dose 10 $\mu$ M (in agreement with our  
586 simulations); abnormalities were seen only in 2 out of 15 laboratories. Potential reason for this  
587 discrepancy can be the higher expression of L-type Ca<sup>2+</sup> channels observed *in vitro* in hiPS-  
588 CMs than in adult cells (13). Blinova et al. (40) state: "Bepridil is a potent hERG blocker that



589 also blocks L-type calcium and peak and late sodium currents at higher concentrations. High  
590 expression levels of calcium ion channels in hiPSC-CMs as compared to primary ventricular  
591 tissue may have contributed to more attenuated cellular proarrhythmic effects of the drug as  
592 compared to other drugs in the high TdP risk category." We were able to test this idea *in silico*:  
593 Figure S15A in the Supporting Material shows  $I_{CaL}$  in the original O'Hara-Rudy model of  
594 human adult ventricular cell (34) (black trace) and in our hiPSC-CM *in silico* population  
595 translated to 37°C (cyan traces). We tested if high levels of  $I_{CaL}$  could have had a pseudo-  
596 protective effect against bepridil in hiPSC-CMs, partially compensating the  $I_{Kr}$  block, resulting  
597 in a milder effect than in cells expressing less  $I_{CaL}$  (e.g. adult cardiomyocytes). At room  
598 temperature, we tested bepridil D4 on 4 *in silico* hiPSC-CMs that showed abnormalities with  
599 astemizole, by reducing bepridil  $I_{CaL}$  blocking power first to half of its original value and then  
600 completely. This resulted in abnormalities in all 4 models (Figure 8), as expected. In addition,  
601 these 4 models in control conditions and 37°C showed  $I_{CaL}$  higher than the adult one (Figure  
602 S15B). Table S2 shows the  $IC_{50}$  used for our *in silico* drug trials, taken from (3). Bepridil has  
603 the closest  $I_{Kr}$  and  $I_{CaL}$   $IC_{50}$  among APD-prolonging drugs. Therefore, an  $I_{CaL}$  block comparable  
604 to  $I_{Kr}$  block in condition of highly expressed  $I_{CaL}$  could indeed compensate APD prolongation  
605 and mask the occurrence of abnormalities, which may have occurred in adult cardiomyocytes  
606 (as reported *in silico* in (3, 47)). Our *in vitro* and *in silico* tests show the undeniable value of  
607 hiPSC-CMs as models for drug testing and how *in silico* simulations could benefit the  
608 interpretation of the *in vitro* tests. The hiPSC-CMs represent a potentially infinite pool of human  
609 cardiomyocytes and can capture key aspects of human cardiac electrophysiology in normal and  
610 diseased conditions (genetic mutations). Therefore, they are a great asset to predict the  
611 occurrence of adverse drug effects, in a unparallel manner that can be patient-specific.

612 As all experimental models, the hiPSC-CMs are not without limitations. For example, they have  
613 different ion current expressions than adult cardiomyocytes, potentially affecting  $I_{Na}$ ,  $I_{CaL}$ ,  $I_{Kr}$   
614 and  $I_{Ks}$  (see Figure 2 in (13)), i.e. currents for which  $IC_{50}$  values are commonly computed. It  
615 must be noted that extensive experimental datasets from healthy adult human cardiomyocytes  
616 are non-existent due to unavailability of such cardiac tissue. Thus, inferences could only be  
617 made based on donor heart-derived human cells (34, 47, 48) or well-studied adult  
618 cardiomyocytes from other species. Nevertheless, different ion channel expressions can lead to  
619 underestimation (as for bepridil) or overestimation of the actual toxicity of a drug. A variety of  
620 optimization approaches are being developed to improve the maturity of the hiPSC-CMs and  
621 bring them closer to an adult phenotype. These include extracellular matrix optimizations,  
622 stimulation protocols, mass transport improvements, alignment, substrate and metabolic  
623 function optimizations etc. (49). Such advances can impact positively cardiotoxicity testing.

624 Overall, commercial hiPSC-CMs (e.g. CDI) have demonstrated their utility and superiority to  
625 animal models, even in their current state of maturity. Here we show the suitability of optically-  
626 recorded data from hiPSC-CMs to produce information that empowers *in silico* modelling. With  
627 suitably-high acquisition rates, optical data can provide accurate temporal biomarkers for *in*  
628 *silico* models. All available  $Ca^{2+}$  data is indeed obtained by optical means; with the  
629 development of new small-molecule and genetically-encoded voltage dyes, AP records may  
630 completely replace electrical measurements due to their contact-less nature, easy parallelization  
631 and ability to measure cell properties in multicellular context. However, absolute values remain  
632 a challenge for optical measurements as voltage and  $Ca^{2+}$ -sensitive dyes are rarely calibrated,  
633 i.e. they cannot provide reliable amplitude information for AP or CaTr, i.e. mV or mM. Such



634 absolute values were essential in (19) to calibrate our first hiPS-CM population; in fact, AP  
635 peak <57.7mV (19) was included as a biomarker here to avoid unrealistic membrane potentials.

636 During our *in silico* tests, three limitations emerged. Firstly, CTD<sub>90</sub>, CTD<sub>50</sub> and CTD<sub>30</sub> are  
637 underestimated during drug administration (Figure 6, rows 1-4). The reason is that the 477  
638 models in the population show relatively short control CaTr despite correct inclusion in the  
639 variability ranges by calibration. While the *in silico* CaTr correctly captured the drug-induced  
640 trends, they underestimated the changes observed experimentally. The *in silico* CaTr Tri<sub>90-30</sub>  
641 matched well the experimental values, i.e. CaTr triangulation during drug administration was  
642 captured. In case of diltiazem (Figure 6, last row) we observed a peculiar behavior of the *in*  
643 *vitro* measurements following drug administration, since the CaTr showed larger CTDs at D2  
644 and D3 than at D1, in spite CTD<sub>90</sub> shortening for increasing diltiazem doses is clear from D2  
645 to D4. The second limitation is that up to D4 *in silico* dofetilide generated few abnormalities,  
646 while D4 dofetilide triggered *in vitro* EADs in all the measurements. We observed already in  
647 (22) that to induce a remarkable amount of EADs or repolarization failures in an *in silico* hiPS-  
648 CM population, we needed I<sub>Kr</sub> block>90%. Conversely, D4 dofetilide blocks only 80% I<sub>Kr</sub>.  
649 With higher doses, tested in (3), we obtained a considerable increase in AP abnormalities.  
650 Finally, we did not observe in our simulations tachyarrhythmias as seen *in vitro* in a few  
651 samples, perhaps due to difference in single vs. multicellular behavior. We observed higher  
652 spontaneous AP rates, e.g. in irregular rhythms (e.g. in Figure S12, panel I, AP rate goes to  
653 0.59Hz or a cycle of 1700ms) or residual activity in case of diltiazem (in Figure S13, Panel B,  
654 rate up to 0.83Hz, corresponding to AP CL of 1200ms). However, we did not observe AP rates  
655 greater than 2Hz.

## 656 Conclusions

657 In conclusion, this work supports the use of high-content, high-quality all-optical  
658 electrophysiology data to develop, calibrate and validate computer models of hiPS-CM for *in*  
659 *silico* drug trials. We report that simultaneously-acquired AP and CaTr enhance the model  
660 calibration process to obtain a final population that better reflects the experimental recordings.  
661 Our population was able to reproduce the effect of 5 different compounds, including the drug-  
662 induced abnormalities observed *in vitro*. *In silico* models constrained by *in vitro* data can be  
663 used to expand the parameter space of the investigations and to glean mechanistic insights into  
664 drug action. Finally, our simulations highlight the importance of being aware and taking into  
665 account potential differences in ionic currents between hiPS-CMs and adult cardiomyocytes,  
666 which could result in differences between *in vitro/in silico* hiPS-CMs and *in vivo* outcomes for  
667 specific compounds.

## 668 Author Contributions

669 AK and EE recorded and analyzed the optical *in vitro* data. MP and SS designed the Paci2019  
670 hiPS-CM model. MP, EP, SS, JH, BR and EE designed the *in silico* tests on the populations of  
671 models. MP implemented the models and software tools used to produce and analyze the *in*  
672 *silico* data. MP, EP and SS analyzed the *in silico* data. All authors contributed to the writing  
673 and reviewed the manuscript.

## 674 Acknowledgements

675 The authors thank Dr. Jussi Koivumäki for sharing his code and for the fruitful discussion about  
676 the updates to the hiPS-CM model. The authors wish also to acknowledge CSC – IT Center for  
677 Science, Finland, for generous computational resources. MP was supported by the Academy  
678 of Finland (decision number 307967). EP and BR were supported by an NC3Rs Infrastructure  
679 for Impart Award (NC/P001076/1), a Wellcome Trust Senior Research Fellowship in Basic  
680 Biomedical Sciences (100246/Z/12/Z, 214290/Z/18/Z), EPSRC Impact Acceleration Awards  
681 (EP/K503769/1), the CompBioMed project (European Commission grant agreement No  
682 675451), the Oxford BHF Centre of Research Excellence (RE/08/004/23915, RE/13/1/30181)  
683 and the TransQST project (Innovative Medicines Initiative 2 Joint Undertaking under grant  
684 agreement No 116030, receiving support from the European Union’s Horizon 2020 research  
685 and innovation programme and EFPIA). EE was supported by the National Institutes of Health  
686 (R01HL144157) and the National Science Foundation (1827535 and 1830941).

## 687 Supporting Citations

688 References (50-55) appear in the Supporting Material.

## 689 References

- 690 1. Strauss, D.G., G. Gintant, Z. Li, W. Wu, K. Blinova, J. Vicente, J.R. Turner, and P.T.  
691 Sager. 2018. Comprehensive In Vitro Proarrhythmia Assay (CiPA) Update from a  
692 Cardiac Safety Research Consortium / Health and Environmental Sciences Institute /  
693 FDA Meeting. *Ther Innov Regul Sci.* : 216847901879511.
- 694 2. Colatsky, T., B. Fermini, G. Gintant, J.B. Pierson, P. Sager, Y. Sekino, D.G. Strauss,  
695 and N. Stockbridge. 2016. The Comprehensive in Vitro Proarrhythmia Assay (CiPA)  
696 initiative — Update on progress. *J Pharmacol Toxicol Methods.* 81: 15–20.
- 697 3. Passini, E., O.J. Britton, H.R. Lu, J. Rohrbacher, A.N. Hermans, D.J. Gallacher, R.J.H.  
698 Greig, A. Bueno-Orovio, and B. Rodriguez. 2017. Human In Silico Drug Trials  
699 Demonstrate Higher Accuracy than Animal Models in Predicting Clinical Pro-  
700 Arrhythmic Cardiotoxicity. *Front Physiol.* 8: 1–15.
- 701 4. Lancaster, M.C., and E. Sobie. 2016. Improved Prediction of Drug-Induced Torsades de  
702 Pointes Through Simulations of Dynamics and Machine Learning Algorithms. *Clin*  
703 *Pharmacol Ther.* 100: 371–379.
- 704 5. Parikh, J., V. Gurev, and J.J. Rice. 2017. Novel Two-Step Classifier for Torsades de  
705 Pointes Risk Stratification from Direct Features. *Front Pharmacol.* 8: 1–18.
- 706 6. Romero, L., J. Cano, J. Gomis-Tena, B. Trenor, F. Sanz, M. Pastor, and J. Saiz. 2018.  
707 In Silico QT and APD Prolongation Assay for Early Screening of Drug-Induced  
708 Proarrhythmic Risk. *J Chem Inf Model.* 58: 867–878.
- 709 7. Li, Z., S. Dutta, J. Sheng, P.N. Tran, W. Wu, K. Chang, T. Mdluli, D.G. Strauss, and T.  
710 Colatsky. 2017. Improving the In Silico Assessment of Proarrhythmia Risk by  
711 Combining hERG (Human Ether-à-go-go-Related Gene) Channel–Drug Binding  
712 Kinetics and Multichannel Pharmacology. *Circ Arrhythmia Electrophysiol.* 10:  
713 e004628.
- 714 8. Li, Z., B.J. Ridder, X. Han, W.W. Wu, J. Sheng, P.N. Tran, M. Wu, A. Randolph, R.H.  
715 Johnstone, G.R. Mirams, Y. Kuryshv, J. Kramer, C. Wu, W.J. Crumb, and D.G.

- 716 Strauss. 2019. Assessment of an In Silico Mechanistic Model for Proarrhythmia Risk  
717 Prediction Under the CiPA Initiative. *Clin Pharmacol Ther.* 105: 466–475.
- 718 9. Lu, H.R., M.P. Hortigon-Vinagre, V. Zamora, I. Kopljar, A. De Bondt, D.J. Gallacher,  
719 and G. Smith. 2017. Application of optical action potentials in human induced  
720 pluripotent stem cells-derived cardiomyocytes to predict drug-induced cardiac  
721 arrhythmias. *J Pharmacol Toxicol Methods.* 87: 53–67.
- 722 10. Lu, H.R., R. Whittaker, J.H. Price, R. Vega, E.R. Pfeiffer, F. Cerignoli, R. Towart, and  
723 D.J. Gallacher. 2015. High throughput measurement of Ca<sup>++</sup>dynamics in human stem  
724 cell-derived cardiomyocytes by kinetic image cytometry: A cardiac risk assessment  
725 characterization using a large panel of cardioactive and inactive compounds. *Toxicol*  
726 *Sci.* 148: 503–516.
- 727 11. Knollmann, B.C. 2013. Induced pluripotent stem cell-derived cardiomyocytes: boutique  
728 science or valuable arrhythmia model? *Circ Res.* 112: 969–976.
- 729 12. Bedada, F.B., M. Wheelwright, and J.M. Metzger. 2016. Maturation status of sarcomere  
730 structure and function in human iPSC-derived cardiac myocytes. *Biochim Biophys Acta*  
731 *- Mol Cell Res.* 1863: 1829–1838.
- 732 13. Blinova, K., J. Stohlman, J. Vicente, D. Chan, L. Johannesen, M.P. Hortigon-Vinagre,  
733 V. Zamora, G. Smith, W.J. Crumb, L. Pang, B. Lyn-Cook, J. Ross, M. Brock, S. Chvatal,  
734 D. Millard, L. Galeotti, N. Stockbridge, and D.G. Strauss. 2017. Comprehensive  
735 Translational Assessment of Human-Induced Pluripotent Stem Cell Derived  
736 Cardiomyocytes for Evaluating Drug-Induced Arrhythmias. *Toxicol Sci.* 155: 234–247.
- 737 14. Paci, M., J. Hyttinen, K. Aalto-Setälä, and S. Severi. 2013. Computational models of  
738 ventricular- and atrial-like human induced pluripotent stem cell derived cardiomyocytes.  
739 *Ann Biomed Eng.* 41: 2334–2348.
- 740 15. Paci, M., R.-P. Pölönen, D. Cori, K. Penttinen, K. Aalto-Setälä, S. Severi, and J.  
741 Hyttinen. 2018. Automatic optimization of an in silico model of human iPSC derived  
742 cardiomyocytes recapitulating calcium handling abnormalities. *Front Physiol.* 9: 709.
- 743 16. Koivumäki, J.T., N. Naumenko, T. Tuomainen, J. Takalo, M. Oksanen, K.A. Puttonen,  
744 Š. Lehtonen, J. Kuusisto, M. Laakso, J. Koistinaho, and P. Tavi. 2018. Structural  
745 Immaturity of Human iPSC-Derived Cardiomyocytes: In Silico Investigation of Effects  
746 on Function and Disease Modeling. *Front Physiol.* 9: 1–17.
- 747 17. Kernik, D.C., S. Morotti, H. Wu, P. Garg, H.J. Duff, J. Kurokawa, J. Jalife, J.C. Wu, E.  
748 Grandí, and C.E. Clancy. 2019. A computational model of induced pluripotent stem-cell  
749 derived cardiomyocytes incorporating experimental variability from multiple data  
750 sources. *J Physiol.* 597: 4533–4564.
- 751 18. Paci, M., J. Hyttinen, B. Rodriguez, and S. Severi. 2015. Human induced pluripotent  
752 stem cell-derived versus adult cardiomyocytes: an in silico electrophysiological study  
753 on effects of ionic current block. *Br J Pharmacol.* 172: 5147–5160.
- 754 19. Paci, M., E. Passini, S. Severi, J. Hyttinen, and B. Rodriguez. 2017. Phenotypic  
755 variability in LQT3 human induced pluripotent stem cell-derived cardiomyocytes and  
756 their response to antiarrhythmic pharmacologic therapy: An in silico approach. *Hear*  
757 *Rhythm.* 14: 1704–1712.
- 758 20. Britton, O.J., A. Bueno-Orovio, K. Van Ammel, H.R. Lu, R. Towart, D.J. Gallacher,

- 759 and B. Rodriguez. 2013. Experimentally calibrated population of models predicts and  
760 explains intersubject variability in cardiac cellular electrophysiology. *Proc Natl Acad*  
761 *Sci U S A*. 110: E2098–E2105.
- 762 21. Muszkiewicz, A., O.J. Britton, P. Gemmell, E. Passini, C. Sánchez, X. Zhou, A. Carusi,  
763 T.A. Quinn, K. Burrage, A. Bueno-Orovio, and B. Rodriguez. 2016. Variability in  
764 cardiac electrophysiology: Using experimentally-calibrated populations of models to  
765 move beyond the single virtual physiological human paradigm. *Prog Biophys Mol Biol*.  
766 120: 115–127.
- 767 22. Paci, M., E. Passini, S. Severi, J. Hyttinen, and B. Rodriguez. 2016. A population of in  
768 silico models to face the variability of human induced pluripotent stem cell-derived  
769 cardiomyocytes: the hERG block case study. In: *Computing in Cardiology*. . pp. 1189–  
770 1192.
- 771 23. Dunlop, J., M. Bowlby, R. Peri, D. Vasilyev, and R. Arias. 2008. High-throughput  
772 electrophysiology: an emerging paradigm for ion-channel screening and physiology. *Nat*  
773 *Rev Drug Discov*. 7: 358–368.
- 774 24. Fertig, N., and C. Farre. 2010. Renaissance of ion channel research and drug discovery  
775 by patch clamp automation. *Future Med Chem*. 2: 691–695.
- 776 25. Klimas, A., C.M. Ambrosi, J. Yu, J.C. Williams, H. Bien, and E. Entcheva. 2016.  
777 OptoDyCE as an automated system for high-throughput all-optical dynamic cardiac  
778 electrophysiology. *Nat Commun*. 7: 11542.
- 779 26. Pfeiffer, E.R., R. Vega, P.M. McDonough, J.H. Price, and R. Whittaker. 2016. Specific  
780 prediction of clinical QT prolongation by kinetic image cytometry in human stem cell  
781 derived cardiomyocytes. *J Pharmacol Toxicol Methods*. .
- 782 27. Ahola, A., A.L. Kiviahho, K. Larsson, M. Honkanen, K. Aalto-Setälä, and J. Hyttinen.  
783 2014. Video image-based analysis of single human induced pluripotent stem cell derived  
784 cardiomyocyte beating dynamics using digital image correlation. *Biomed Eng Online*.  
785 13: 39.
- 786 28. Ahola, A., R.-P. Pölönen, K. Aalto-Setälä, and J. Hyttinen. 2018. Simultaneous  
787 Measurement of Contraction and Calcium Transients in Stem Cell Derived  
788 Cardiomyocytes. *Ann Biomed Eng*. 46: 148–158.
- 789 29. Entcheva, E. 2013. Cardiac optogenetics. *Am J Physiol - Hear Circ Physiol*. 304.
- 790 30. Hochbaum, D.R., Y. Zhao, S.L. Farhi, N. Klapoetke, C.A. Werley, V. Kapoor, P. Zou,  
791 J.M. Kralj, D. Maclaurin, N. Smedemark-Margulies, J.L. Saulnier, G.L. Boulting, C.  
792 Straub, Y.K. Cho, M. Melkonian, G.K.-S. Wong, D.J. Harrison, V.N. Murthy, B.L.  
793 Sabatini, E.S. Boyden, R.E. Campbell, and A.E. Cohen. 2014. All-optical  
794 electrophysiology in mammalian neurons using engineered microbial rhodopsins. *Nat*  
795 *Methods*. 11: 825–833.
- 796 31. Dempsey, G.T., K.W. Chaudhary, N. Atwater, C. Nguyen, B.S. Brown, J.D. McNeish,  
797 A.E. Cohen, and J.M. Kralj. 2016. Cardiotoxicity screening with simultaneous  
798 optogenetic pacing, voltage imaging and calcium imaging. *J Pharmacol Toxicol*  
799 *Methods*. 81: 240–250.
- 800 32. Klimas, A., G. Ortiz, S.C. Boggess, E.W. Miller, and E. Entcheva. 2019. Multimodal  
801 on-axis platform for all-optical electrophysiology with near-infrared probes in human

- 802 stem-cell-derived cardiomyocytes. *Prog Biophys Mol Biol.* 3: 1–9.
- 803 33. Kim, J.J., L. Yang, B. Lin, X. Zhu, B. Sun, A.D. Kaplan, G.C.L. Bett, R.L. Rasmusson,  
804 B. London, and G. Salama. 2015. Mechanism of automaticity in cardiomyocytes derived  
805 from human induced pluripotent stem cells. *J Mol Cell Cardiol.* 81: 81–93.
- 806 34. O’Hara, T., L. Virág, A. Varró, and Y. Rudy. 2011. Simulation of the Undiseased  
807 Human Cardiac Ventricular Action Potential: Model Formulation and Experimental  
808 Validation. *PLoS Comput Biol.* 7: e1002061.
- 809 35. ten Tusscher, K.H.W.J., D. Noble, P.J. Noble, and A. V Panfilov. 2004. A model for  
810 human ventricular tissue. *Am J Physiol Hear Circ Physiol.* 286: H1573-1589.
- 811 36. Stieber, J., S. Herrmann, and A. Ludwig. 2009. Hyperpolarization-activated, cyclic  
812 nucleotide-gated (HCN) channels: from genes to function. In: *Cardiac*  
813 *Electrophysiology: From Cell to Bedside.* Elsevier. p. 1184.
- 814 37. Mauerhöfer, M., and C.K. Bauer. 2016. Effects of Temperature on Heteromeric  
815 Kv11.1a/1b and Kv11.3 Channels. *Biophys J.* 111: 504–523.
- 816 38. Paci, M., S. Casini, M. Bellin, J. Hyttinen, and S. Severi. 2018. Large-Scale Simulation  
817 of the Phenotypical Variability Induced by Loss-of-Function Long QT Mutations in  
818 Human Induced Pluripotent Stem Cell Cardiomyocytes. *Int J Mol Sci.* 19: 3583.
- 819 39. Paci, M., E. Passini, A. Klimas, S. Severi, J. Hyttinen, B. Rodriguez, and E. Entcheva.  
820 2018. In Silico Populations Optimized on Optogenetic Recordings Predict Drug Effects  
821 in Human Induced Pluripotent Stem Cell-derived Cardiomyocytes. In: *Computing in*  
822 *Cardiology.* . p. accepted for publication.
- 823 40. Blinova, K., Q. Dang, D. Millard, G. Smith, J. Pierson, L. Guo, M. Brock, H.R. Lu, U.  
824 Kraushaar, H. Zeng, H. Shi, X. Zhang, K. Sawada, T. Osada, Y. Kanda, Y. Sekino, L.  
825 Pang, T.K. Feaster, R. Kettenhofen, N. Stockbridge, D.G. Strauss, and G. Gintant. 2018.  
826 International Multisite Study of Human-Induced Pluripotent Stem Cell-Derived  
827 Cardiomyocytes for Drug Proarrhythmic Potential Assessment. *Cell Rep.* 24: 3582–  
828 3592.
- 829 41. Woosley, R., C. Heise, and K. Romero. 2019. [www.CredibleMeds.org](http://www.CredibleMeds.org), QTdrugs List. .
- 830 42. Zeng, H., J. Wang, H. Clouse, A. Lagrutta, and F. Sannajust. 2018. Resolving the  
831 Reversed Rate Effect of Calcium Channel Blockers on Human Induced Pluripotent Stem  
832 Cell-Derived Cardiomyocytes and the Impact on in vitro Cardiac Safety Evaluation.  
833 *Toxicol Sci.* : 1–8.
- 834 43. Ma, J., L. Guo, S.J. Fiene, B.D. Anson, J.A. Thomson, T.J. Kamp, K.L. Kolaja, B.J.  
835 Swanson, and C.T. January. 2011. High purity human-induced pluripotent stem cell-  
836 derived cardiomyocytes: electrophysiological properties of action potentials and ionic  
837 currents. *AJP - Hear Circ Physiol.* 301: H2006–H2017.
- 838 44. Rast, G., J. Weber, C. Disch, E. Schuck, C. Ittrich, and B.D. Guth. 2015. An integrated  
839 platform for simultaneous multi-well field potential recording and Fura-2-based calcium  
840 transient ratiometry in human induced pluripotent stem cell (hiPSC)-derived  
841 cardiomyocytes. *J Pharmacol Toxicol Methods.* 75: 91–100.
- 842 45. Rast, G., U. Kraushaar, S. Buckenmaier, C. Ittrich, and B.D. Guth. 2016. Influence of  
843 field potential duration on spontaneous beating rate of human induced pluripotent stem  
844 cell-derived cardiomyocytes: Implications for data analysis and test system selection. *J*



- 845 Pharmacol Toxicol Methods. 82: 74–82.
- 846 46. Redfern, W., L. Carlsson, A. Davis, W. Lynch, I. Mackenzie, S. Palethorpe, P. Siegl, I.  
847 Strang, A. Sullivan, and R. Wallis. 2003. Relationships between preclinical cardiac  
848 electrophysiology, clinical QT interval prolongation and torsade de pointes for a broad  
849 range of drugs: evidence for a provisional safety margin in drug development.  
850 Cardiovasc Res. 58: 32–45.
- 851 47. Britton, O.J., A. Bueno-Orovio, L. Virág, A. Varró, and B. Rodriguez. 2017. The  
852 electrogenic Na<sup>+</sup>/K<sup>+</sup> pump is a key determinant of repolarization abnormality  
853 susceptibility in human ventricular cardiomyocytes: A population-based simulation  
854 study. Front Physiol. 8: 1–13.
- 855 48. Britton, O.J., N. Abi-Gerges, G. Page, A. Ghetti, P.E. Miller, and B. Rodriguez. 2017.  
856 Quantitative comparison of effects of dofetilide, sotalol, quinidine, and verapamil  
857 between human ex vivo trabeculae and in silico ventricular models incorporating inter-  
858 individual action potential variability. Front Physiol. 8: 1–19.
- 859 49. Dunn, K.K., and S.P. Palecek. 2018. Engineering Scalable Manufacturing of High-  
860 Quality Stem Cell-Derived Cardiomyocytes for Cardiac Tissue Repair. Front Med. 5.
- 861 50. Fabbri, A., M. Fantini, R. Wilders, and S. Severi. 2017. Computational analysis of the  
862 human sinus node action potential: model development and effects of mutations. J  
863 Physiol. 7: 2365–2396.
- 864 51. Volders, P.G., M. a Vos, B. Szabo, K.R. Sipido, S.H. de Groot, a P. Gorgels, H.J.  
865 Wellens, and R. Lazzara. 2000. Progress in the understanding of cardiac early  
866 afterdepolarizations and torsades de pointes: time to revise current concepts. Cardiovasc  
867 Res. 46: 376–92.
- 868 52. Chauveau, S., E.P. Anyukhovskiy, M. Ben-Ari, S. Naor, Y.-P. Jiang, P. Danilo, T.  
869 Rahim, S. Burke, X. Qiu, I.A. Potapova, S. V. Doronin, P.R. Brink, O. Binah, I.S.  
870 Cohen, and M.R. Rosen. 2017. Induced Pluripotent Stem Cell-Derived Cardiomyocytes  
871 Provide In Vivo Biological Pacemaker Function. Circ Arrhythmia Electrophysiol. 10:  
872 1–10.
- 873 53. Hopenfeld, B. 2006. Mechanism for action potential alternans: The interplay between  
874 L-type calcium current and transient outward current. Hear Rhythm. 3: 345–352.
- 875 54. Kramer, J., C. a Obejero-Paz, G. Myatt, Y. a Kuryshev, A. Bruening-Wright, J.S.  
876 Verducci, and A.M. Brown. 2013. MICE models: superior to the HERG model in  
877 predicting Torsade de Pointes. Sci Rep. 3: 2100.
- 878 55. Crumb, W.J., J. Vicente, L. Johannesen, and D.G. Strauss. 2016. An evaluation of 30  
879 clinical drugs against the comprehensive in vitro proarrhythmia assay (CiPA) proposed  
880 ion channel panel. J Pharmacol Toxicol Methods.
